1 **Longitudinal *in vivo* micro-CT-based approach allows spatio-temporal characterization of**  
2 **fracture healing patterns and assessment of biomaterials in mouse femur defect models**

3 Esther Wehrle<sup>1</sup>, Duncan C Tourolle né Betts<sup>1</sup>, Gisela A Kuhn<sup>1</sup>, Erica Floreani<sup>1</sup>, Malavika H  
4 Nambiar<sup>1</sup>, Bryant J Schroeder<sup>1</sup>, Sandra Hofmann<sup>1,2</sup>, Ralph Müller<sup>1\*</sup>

5 <sup>1</sup> Institute for Biomechanics, ETH Zurich, Zurich, Switzerland, <sup>2</sup> Department of Biomedical  
6 Engineering and Institute for Complex Molecular Systems, Eindhoven University of  
7 Technology, The Netherlands.

8

9

10 **Corresponding author:**

11 Ralph Müller, PhD

12 Institute for Biomechanics

13 ETH Zurich

14 Leopold-Ruzicka-Weg 4

15 8093 Zurich, Switzerland

16 Email: ram@ethz.ch

17

18

19 **Abstract**

20 Thorough preclinical evaluation of functionalized biomaterials for treatment of large bone  
21 defects is essential prior to clinical application. Using *in vivo* micro-computed tomography  
22 (micro-CT) and mouse femoral defect models with different defect sizes, we were able to  
23 detect spatio-temporal healing patterns indicative of physiological and impaired healing in  
24 three defect sub-volumes and the adjacent cortex. The time-lapsed *in vivo* micro-CT-based  
25 approach was then applied to evaluate the bone regeneration potential of functionalized  
26 biomaterials using collagen and BMP-2. Both collagen and BMP-2 treatment led to distinct  
27 changes in bone turnover in the different healing phases. Despite increased periosteal bone  
28 formation, 87.5% of the defects treated with collagen scaffolds resulted in non-unions.  
29 Additional BMP-2 application significantly accelerated the healing process and increased the  
30 union rate to 100%. This study further shows potential of time-lapsed *in vivo* micro-CT for  
31 capturing spatio-temporal deviations preceding non-union formation and how this can be  
32 prevented by application of functionalized biomaterials.

33 This study therefore supports the application of longitudinal *in vivo* micro-CT for  
34 discrimination of normal and disturbed healing patterns and for the spatio-temporal  
35 characterization of the bone regeneration capacity of functionalized biomaterials.

36

## 37 Introduction

38 Regeneration and healing of large bone defects (e.g. caused by trauma, infection, tumor  
39 resection, congenital skeletal disorders) is a treatment challenge in orthopedic surgery with  
40 as much as 10-20% of patients experiencing delayed or non-unions<sup>1-3</sup>. Recent advances in  
41 tissue engineering and material sciences (e.g. 3D-bioprinting) enabled the development of  
42 diverse biomaterials, which can be functionalized with biochemical factors (e.g. growth  
43 factors) and combined with cell therapeutic approaches<sup>3-5</sup>. In order to facilitate the clinical  
44 application of these innovative approaches for the treatment of large bone defects, their bone  
45 regeneration capacity needs to be systematically and thoroughly characterized in preclinical  
46 studies<sup>6-8</sup>. For this purpose, critical size defect models have been developed for load-bearing  
47 and non-load-bearing bones in small and large animals<sup>7,9-13</sup>. So far, most of these studies  
48 focused their evaluation on end-point radiological and histological analysis<sup>14-16</sup>. However,  
49 recent studies indicate that longitudinal non-invasive imaging could improve the evaluation  
50 of a biomaterial's bone regeneration capacity, due to the ability to follow the regeneration  
51 process in the same animal over time, thereby also reducing animal numbers according to the  
52 3R's of animal welfare<sup>17,18</sup>. Particularly, *in vivo* micro-CT was shown to be suitable for the  
53 assessment of bone tissue formation and mineralization after biomaterial application in  
54 critical size defect models<sup>17-19</sup>. A further development is the consecutive registration of time-  
55 lapsed *in vivo* images<sup>20</sup>. We recently developed a longitudinal *in vivo* micro-CT-based  
56 approach for healing-phase-specific monitoring of fracture repair in mouse femur defect  
57 models<sup>21</sup>. Registration of consecutive scans using a branching scheme (bridged vs. unbridged  
58 defect) combined with a two/multi-threshold approach enabled the assessment of localized  
59 bone turnover and mineralization kinetics relevant for monitoring callus remodelling<sup>21,22</sup>.

60 Furthermore, we showed that longitudinal *in vivo* micro-CT imaging itself did not significantly  
61 affect callus formation and remodelling<sup>22</sup>.

62 It is well accepted that longitudinal non-invasive imaging of the healing process is  
63 advantageous compared to cross-sectional study designs<sup>22</sup>. In order to apply *in vivo* micro-CT-  
64 based longitudinal monitoring approaches for the evaluation of functionalized biomaterials, it  
65 has to be assessed, whether these approaches allow for reliable discrimination between  
66 normal and impaired healing conditions (e.g. critical-sized defects). So far, preclinical studies  
67 were often not able to reliably capture the bone healing potential of biomaterials due to  
68 limitations in study design: (I) cross-sectional setup, (II) assessment not considering defect  
69 sub-volumes, (III) assessment not specific to the healing phases.

70 Therefore, this study assesses whether our recently developed time-lapsed micro-CT based  
71 monitoring approach is suitable for discrimination of healing patterns associated with  
72 physiological and impaired bone healing conditions using mouse femur defect models with  
73 different gap sizes. In a second step, we evaluated whether the time-lapsed *in vivo* micro-CT-  
74 based monitoring approach is suitable for profound characterization of the bone regeneration  
75 capacity of functionalized biomaterials using well characterized porous collagen scaffolds and  
76 bone morphogenetic protein (BMP-2) as gold standard

77

## 78 **Results**

79 In Experiment 1, we assessed the potential of time-lapsed *in vivo* micro-CT for reliable  
80 discrimination between physiological and impaired fracture healing patterns. We compared  
81 the healing process (week 0-6) in mice receiving either a small (0.9mm, n=10) or large femur

82 defect (2mm, n=8; Fig. 1; Supplementary Video 1). Via registration of consecutive micro-CT  
83 scans, structural and dynamic callus parameters were followed in three callus sub-volumes  
84 (defect center, DC; defect periphery, DP; cortical fragment periphery, FP) and the adjacent  
85 cortical fragments (FC) over time (Fig. 1, 2). In Experiment 2, we applied the same time-lapsed  
86 *in vivo* imaging approach to assess the bone regeneration capacity of collagen scaffolds (n=8)  
87 and collagen scaffolds+BMP-2 (n=8; Fig. 3, 4, Supplementary Video 2; for detailed study design  
88 see Supplementary Table S1).

### 89 **General physical observation**

90 Post-operative monitoring was performed with a scoring system defined in license number  
91 36/2014 (Kantonales Veterinärämte Zürich, Zurich, Switzerland), evaluating the following  
92 parameters: social behaviour, body position, motion, load bearing of operated limb, habitus,  
93 surgery wound. Scoring values: 0-4 (0=normal, 4=severely impaired, end-point criteria: scored  
94 4 in one category or overall score  $\geq 8$ ). Monitoring schedule: evening of surgery day, day 1-3:  
95 morning and evening, day 4 until end of experiment: 3x/week, daily if scored  $\geq 2$  in one  
96 criterion. All mice recovered rapidly from surgery. However, one animal from the 0.9mm  
97 defect group only showed minor load bearing of the operated limb in the first post-operative  
98 week, which then gradually increased, reaching normal values after 2 weeks. The body weight  
99 did not significantly change during the healing period and did not differ between the groups  
100 in Experiment 1 and 2 (see Supplementary Fig. 1 and 2). Social interaction between mice and  
101 nesting behaviour did not differ from pre-surgical observations and were similar for animals  
102 from all groups.

103

### 104 **VOIs for evaluation by time-lapsed *in vivo* micro-CT**

105 **Experiment 1:**

106 In order to exclude bias in the further micro-CT analyses, we compared the size of the two  
107 central VOIs (DC, FC) used for normalization of CT parameters (depicted in Fig. 2) between  
108 groups. One animal from the 2.0mm group could not be included in the analysis due to  
109 incorrect registration caused by differences in leg alignment between micro-CT scans. The two  
110 central VOIs encompassed the following volume for the 0.9mm group (n=10) and the 2.0mm  
111 group (n=7) with significant group differences given in brackets:  $1.64\pm 0.19\text{mm}^3$  vs.  
112  $3.45\pm 0.18\text{mm}^3$  for DC ( $p<0.0001$ ), and  $3.18\pm 0.12\text{mm}^3$  vs.  $0.94\pm 0.30\text{mm}^3$  for FC ( $p<0.0001$ ).

113 **Experiment 2:**

114 The DC and FC VOIs encompassed the following volume for the collagen group (n=8) and the  
115 collagen+BMP-2 group (n=8):  $3.09\pm 0.22\text{mm}^3$  vs.  $3.15\pm 0.22\text{mm}^3$  for DC and  $1.25\pm 0.26\text{mm}^3$  vs.  
116  $1.47\pm 0.19\text{mm}^3$  for FC. No significant group differences in VOI size were detected between the  
117 two groups.

118

119 **Longitudinal monitoring of fracture healing by time-lapsed *in vivo* micro-CT in non-critical**  
120 **and critical-sized femur defects (Experiment 1)**

121 In both groups the repeated micro-CT scans (1x/week, Fig. 1, Supplementary Video 1) covered  
122 the period from the day of the defect surgery (d0) until post-operative week 6. In the 0.9mm  
123 group, distinct callus characteristics indicative of the different healing phases (inflammation,  
124 repair, remodelling) were seen in the three callus VOIS (DC, DP, FP; Fig. 1 and Fig. 2) as  
125 previously described in the same femur defect model<sup>22</sup>. Specifically, a strong increase in bone  
126 formation with maximum values in week 1-2 (BFR: DC -  $3.67\pm 1.50\%$ ) and week 2-3 (BFR: DP -  
127  $2.44\pm 1.31\%$ , FP -  $2.50\pm 0.89\%$ ; Fig. 2) indicated the progression from the inflammation to the

128 repair phase. This triggered bone resorption with maximum values seen in week 2-3 (BRR: DC  
129 -  $1.15 \pm 0.48\%$ ) and week 3-4 (BRR: DP -  $0.82 \pm 0.74\%$ , FP -  $0.86 \pm 0.48\%$ ) indicating progression to  
130 the remodelling phase. In all callus VOIs, a significant increase ( $p < 0.0001$ ) in bone volume was  
131 seen over time with maximum values observed in week 4 (BV/TV: DC -  $44 \pm 9\%$ , DP -  $24 \pm 10\%$ ,  
132 FP -  $29 \pm 8\%$ ). From week 2 onwards, the fraction of highly mineralized bone continuously  
133 increased in all callus VOIs until the study endpoint (week 6).

134 In the 2.0mm defect group, only a slight onset in bone formation was seen in the callus VOIs  
135 from week 0-1 to week 1-2 without characteristic peak values in the further healing process  
136 (Fig. 1 and 2). We could also not observe any significant gain in bone volume throughout the  
137 healing period, indicating an impaired and delayed healing pattern. Nevertheless, we saw a  
138 continuous increase in the fraction of highly mineralized bone in all callus VOIs, indicating no  
139 substantial disturbances of callus mineralization, despite the small callus volume. Comparison  
140 of both groups (0.9mm defect, 2.0mm defect) showed similar patterns in healing initiation  
141 with bone formation, first starting in the defect center (DC) and the cortical fragment  
142 periphery (FP) from week 0-1 to week 1-2. However, in the DC VOI the increase in bone  
143 formation (6x) was significantly lower ( $p = 0.001$ ) in the 2mm group compared to the 0.9mm  
144 group (19x) and the bone formation rates then remained stable at low values ( $\leq 0.95\%/day$ )  
145 throughout the healing period associated with only little endosteal callus formation. In the FP  
146 VOI, the increase in bone formation from week 0-1 to week 1-2 was similar for both groups,  
147 but the 2.0mm defect group then showed a sudden decline (-40%) in bone formation (week  
148 1-2 vs week 2-3) leading to premature cessation of periosteal callus formation. In the defect  
149 periphery (DP), hardly any callus formation (BFR  $\leq 0.21\%/day$ ) was seen in the 2.0mm defect  
150 group throughout the healing period leading to significantly smaller callus dimensions

151 compared to the 0.9mm group from week 3 until the study end ( $p=0.0001$ ). With respect to  
152 bone resorption, no significant differences between the two defect groups were seen in the  
153 early healing period (week 0-1, week 1-2) in any of the callus sub-volumes. However, in the  
154 later healing period, bone resorption was significantly lower in the 2.0mm defect group  
155 compared to the 0.9mm defect group in DC (week 2-3:  $p=0.047$ , week 4-5:  $p=0.0064$ ), FP  
156 (week 2-3:  $p=0.0045$ , week 5-6:  $p=0.0048$ ) and DP (week 4-5:  $p=0.0157$ , week 5-6:  $p=0.0177$ )  
157 VOIs, indicating impaired bone remodelling. By week 6, not only the bone volume, but also  
158 the fraction of highly mineralized bone was lower in all callus sub-volumes in the 2.0mm defect  
159 group compared to the 0.9mm defect group with significant differences ( $p=0.0383$ ) being  
160 observed in the DP sub-volume ( $BV_{645}/BV_{395}$ : 2.0mm group -  $63\pm 11\%$ , 0.9mm group -  $82\pm 4\%$ ).

161

162 To assess functional healing outcome, we particularly focused on the defect VOIs (DC+DP)  
163 which are most important for evaluating later healing time points during the remodelling  
164 phase of fracture healing. The previously observed differences in bone turnover, bone volume  
165 and mineralization between the two groups also affected cortical bridging. According to the  
166 standard clinical evaluation of X-rays, the number of bridged cortices per callus was evaluated  
167 in two perpendicular planes and animals with  $\geq 3$  bridged cortices were categorized as healed.  
168 Cortical bridging first occurred by week 3 in 70% of the animals in the 0.9mm defect group,  
169 whereas none of the animals in the 2.0mm group showed bridged cortices at this time point  
170 (Table 1). By week 6, 90% of the 0.9mm defects were categorized as healed with only 1 defect  
171 being classified as non-union. In contrast, in the 2.0mm defect group only 1 animal showed  
172 cortical bridging and 87.5% manifested as non-unions.

173



174 Bone turnover in the cortical fragments (FC) showed a similar pattern in both groups, without  
175 characteristic peak values in bone formation and resorption rates. Specifically, maximum bone  
176 formation rates were significantly lower (0.9mm group: -80%,  $p < 0.0001$ , 2.0mm group: -58%,  
177  $p = 0.004$ ) compared to those observed in the periosteal region (FP). Furthermore, a negative  
178 bone turnover was seen with maximum resorption rates (BRR in week 2-3:  $0.79 \pm 0.15\%$ )  
179 exceeding bone formation rates (BFR in week 2-3:  $0.49 \pm 0.37\%$ ) in the 0.9mm group. This  
180 resulted in a decrease in bone volume over time (0.9mm group: -19%, 2.0mm group: -57%).  
181 Additionally, a significant 8% (0.9mm group,  $p = 0.0017$ ) and 11% (2.0mm group,  $p = 0.0072$ )  
182 decrease in the fraction of highly mineralized bone was seen from week 1 to week 3 suggesting  
183 reorganization of the cortical bone adjacent to the forming and remodelling fracture callus.

184

185 **Longitudinal assessment of biomaterials by time-lapsed *in vivo* micro-CT in critical-sized**  
186 **femur defects (Experiment 2)**

187 In the collagen group, no significant weekly changes in bone formation rate were seen in the  
188 central defect VOIs (DC, DP; Fig. 3 and 4; Supplementary Video 2). Bone resorption rates  
189 slightly but significantly increased during the early healing period (DC: 7.6x from week 0-1 to  
190 week 1-2, DP: 4.3x from week 0-1 to week 1-2) and then decreased (DC) or remained stable  
191 (DP) from week 2-3 to week 5-6. This led to only little callus formation in these central VOIs,  
192 as similarly seen in the 2mm defect group from Experiment 1, indicating an impaired endosteal  
193 fracture healing pattern associated with the application of the collagen scaffolds. In the  
194 periosteal VOI (FP), a significant 3.2x increase in bone formation rate was seen from week 0-  
195 1 to week 1-2, which remained stable during the subsequent week, before decreasing after  
196 week 2-3 reaching baseline values by week 5-6. No significant changes were seen in the bone

197 resorption rate throughout the healing process. Compared to the 2mm defect group from  
198 Experiment 1, similar periosteal callus volumes were observed in the early healing period  
199 (BV/TV in week 2: collagen group:  $13.08 \pm 4.88\%$ , 2mm defect group:  $15.99 \pm 5.09\%$ ). In the  
200 collagen group, the periosteal callus volume further increased (+53%) from week 2 to week 3,  
201 whereas it decreased (-30%) in the 2mm defect group during the same period, suggesting  
202 changes in periosteal callus formation potentially associated with the application of the  
203 collagen scaffolds.

204 In the collagen+BMP-2 group, a similar healing pattern compared to the collagen group was  
205 seen in the defect center (DC). Nevertheless, BMP-2 application led to a significantly 2.1x  
206 increased bone formation rate in week 1-2 compared to the collagen group, which was also  
207 associated with a transiently increased mineralized callus volume in this endosteal VOI in week  
208 2. However, in week 6, both groups showed similar callus volumes and fraction of highly  
209 mineralized bone, indicating only a slight and transient BMP-2 associated effect on callus  
210 formation and remodelling in the defect center. In contrast, in DP and FP VOIs a completely  
211 different picture was seen: compared to the collagen group, a sudden 17x (DP) and 3.6x (FP)  
212 induction in BFR already from week 0-1 to week 1-2 was detected. This indicates that  
213 collagen+BMP-2 scaffolds are able to induce bone formation at defect locations distant to the  
214 cortical bone potentially allowing healing of large defects. The BMP-2 induced increase in the  
215 bone formation rate was higher but persisted shorter compared to the 0.9mm defect group  
216 with uncompromised healing in Experiment 1. This led to a significant 318x (DP) and 9.1x (FP)  
217 increase in bone volume by week 2 (DP:  $p < 0.0001$ ; FP:  $p = 0.0002$ ). The periosteal callus volume  
218 significantly ( $p < 0.0001$  for DP and FP) exceeded the values of the collagen group and was also  
219 higher compared to the 0.9mm group from Experiment 1. In both VOIs a significant 63x (DP)

220 and 10x (FP) increase in bone resorption was seen from week 1-2 to week 2-3 ( $p < 0.0001$  for  
221 both VOIs), indicating early onset of callus remodelling. The bone resorption rates then  
222 remained at significantly higher levels compared to the collagen group and both groups from  
223 Experiment 1, indicating pronounced callus remodelling in the collagen+BMP-2 group. The  
224 fraction of highly mineralized tissue remained significantly lower in the collagen+BMP-2 group  
225 indicating that the remodelling process was still ongoing, whereas the bone healing process  
226 had finished in all other groups.

227 Despite the BMP-2 associated improved healing outcome, the healing pattern was completely  
228 different compared to the 0.9mm defect group with uncompromised healing. In the  
229 collagen+BMP-2 group bone formation mainly took place in the periosteal regions and the  
230 defect periphery, whereas in the 0.9mm defect group bone formation mainly took place in the  
231 defect center. The collagen group showed similar values compared to the 2.0mm defect group  
232 indicating impaired healing, suggesting that the collagen scaffold might have blocked  
233 endosteal callus formation.

234 In the FC VOI, we saw a similar pattern in all indices for the collagen and the collagen+BMP-2  
235 group without any significant differences between groups. Specifically, the bone formation  
236 rate did not significantly change over time in both groups. Similar to the 2mm defect group  
237 from Experiment 1, a significant induction of bone resorption rate was seen from week 0-1 to  
238 week 1-2. From week 1 until the study end, the bone volume significantly ( $p < 0.0001$ )  
239 decreased in both groups (collagen group: -48%, collagen+BMP-2 group: -44%). Furthermore,  
240 a significant decline in the fraction of highly mineralized bone was observed in both groups  
241 from week 0 to week 6 (collagen group: -9%,  $p = 0.0002$ ; collagen+BMP-2 group: -13%,  
242  $p < 0.0001$ ), as similarly observed for the 2mm defect group in Experiment 1 (-16%,  $p = 0.003$ ).

243

244 Cortical bridging occurred by week 2 in 100% of the animals in the collagen+BMP-2 group,  
245 whereas no animal in the collagen group showed bridged cortices at this time point (Table 2).  
246 In the BMP-2 treated defects, cortical bridging also occurred 1 week earlier compared to the  
247 0.9mm defect group from Experiment 1. In contrast, in the collagen group only 1 animal  
248 showed cortical bridging and 87.5% manifested as non-unions.

249

## 250 **Histology**

251 As shown by Safranin-O staining six weeks after osteotomy, hardly any cartilage residuals were  
252 present in the defect region in all groups, indicating progression of the healing process to the  
253 final remodelling stage (Fig. 5, Row 1 and 2). To visualize potential remnants of the collagen  
254 scaffolds in Experiment 2, 1-2 samples/group were stained with Sirius-Red (Fig. 5, Row 3 and  
255 4). For comparisons, we also included sections of the original collagen scaffolds (Fig. 5, Row  
256 5), where red color of the filaments is indicative of collagen. In contrast, no red signal  
257 indicative of collagen was seen in the defect center of both groups (Fig. 5, Row 4). This  
258 suggested complete degradation of the scaffolds with accumulation of fat cells in the defect  
259 (unbridged defects in collagen group and in the restored medullary cavity, bridged defects in  
260 the collagen+BMP-2 group; Fig. 5, Row 4).

261

## 262 **Discussion**

263 In this study, we showed that time-lapsed *in vivo* micro-CT allows for spatio-temporal  
264 discrimination between physiological and impaired fracture healing patterns in a mouse femur  
265 defect model. For this purpose, we compared the healing pattern in three callus sub-volumes

266 and the adjacent cortical fragments in a small (0.9mm) and a large (2.0mm) defect group using  
267 a previously developed two-threshold density micro-CT protocol <sup>21,22</sup>. In a second step, we  
268 applied the micro-CT based monitoring approach for the characterization of the bone  
269 regeneration capacity of functionalized biomaterials using porous collagen scaffolds +/- bone  
270 morphogenetic protein (BMP-2).

271 By registering consecutive scans, we were able to include dynamic parameters such as bone  
272 formation and resorption in our micro-CT based monitoring approach as previously described  
273 <sup>21</sup>. In the small defect group (0.9mm), this allowed for characterization of the different healing  
274 phases seen by changes in formation and resorption in the osseous callus volume. Specifically,  
275 we saw that the initiation of bone formation (maximum in week 1-2), indicating the onset of  
276 the reparative phase, triggered bone resorption (maximum in week 2-3) thereby initiating the  
277 remodelling phase. Maximum osseous callus volumes were observed in week 3, which  
278 remained stable until the study end, while the callus mineralization increased throughout the  
279 healing period. The observed bone turnover (bone formation triggering bone resorption) and  
280 callus maturation (increasing mineralization of initial callus) patterns are similar to a recent  
281 study in 1.5mm defects, which showed an uncompromised healing pattern <sup>22</sup>. However, the  
282 smaller defect size (- 40%) in the current study, changed the temporal occurrence of peaks in  
283 bone formation and resorption, which were seen one week earlier compared to the previous  
284 study in 1.5mm defects, indicating faster healing progression.

285 As expected from literature <sup>23</sup>, the larger defects (2.0mm) showed impaired healing  
286 predominantly leading to non-unions in 7 of 8 animals at the study end (Fig. 2, Table 1). This  
287 is in line with a study by Zwingenberger et al. <sup>23</sup>, which previously showed a strong correlation  
288 of the defect size and non-unions assessed via *in vivo* X-ray measurements as well as end point

289 micro-CT and histological analyses in a similar defect model. Via registration of consecutive *in*  
290 *vivo* micro-CT scans, we were now able to reveal and visualize the preceding spatio-temporal  
291 deviations in callus formation and remodelling compared to the uncompromised healing  
292 pattern seen in the 0.9mm defect group. Deviations from normal healing occurred in all callus  
293 sub-volumes (defect center, defect periphery, cortical fragment periphery), although initiation  
294 of bone formation was not changed spatio-temporally, starting in the same sub-volumes (DC,  
295 FP) and at the same time (week 0-1 to week 1-2). However, the rise in bone formation was  
296 significantly lower endosteally and the duration of the bone formation was reduced  
297 periosteally compared to the 0.9mm defect group. This also led to only small endosteal and  
298 peripheral callus dimensions with the periosteal callus volume even decreasing to baseline  
299 values by the study end. Under normal healing conditions, callus formation in this femur  
300 defect model proceeds from both the endosteal and the periosteal regions to the defect  
301 periphery<sup>22,24</sup>, whereas in large defects hardly any bone formation was seen here, suggesting  
302 early termination of the fracture healing process.

303 It is important to separately look at the adjacent cortical fragments<sup>22</sup>, where we previously  
304 saw an opposite trend in bone turnover compared to the callus sub-volumes. Whereas bone  
305 formation was the dominant factor in the callus VOIs, bone resorption was the main factor in  
306 the adjacent cortex. In the current study, increased defect size was associated with a  
307 significant higher decline in cortical bone volume (-67% vs. -19%) and bone mineral density (-  
308 16% vs. -6%; Fig. 1 and Fig. 2). Peri-fracture bone resorption and demineralization of cortical  
309 bone have also been previously reported in preclinical and clinical studies and were associated  
310 with stiff fixation leading to stress shielding of the bone<sup>25,26</sup>. Our recently developed time-

311 lapsed *in vivo* micro-CT monitoring approach therefore allowed to precisely characterize the  
312 spatio-temporal changes in structural and dynamic callus parameters preceding non-unions.  
313 In a next step, we applied this monitoring approach to evaluate the bone regeneration  
314 potential of biomaterials using collagen +/- BMP-2 as test materials. We selected collagen as  
315 test material due to its wide usage in scaffolds intended for promotion of bone regeneration  
316 and the comprehensive literature on its performance in *in vitro*, preclinical and clinical  
317 applications <sup>27-29</sup>. In our study, the application of collagen scaffolds did not significantly  
318 improve bone regeneration compared to empty defects of the same size, with the same non-  
319 union rates being observed at the study end (87.5% in both groups). Although periosteal bone  
320 formation was more pronounced in the collagen group, the fracture healing outcome was not  
321 different between groups. This is in line with previous bone defect studies in different rodent  
322 models (loaded and non-loaded bones) reporting no significant effect of collagen scaffolds on  
323 bone regeneration with incomplete bone union or non-unions at the study end <sup>30,31</sup>. Similarly,  
324 in large animal models collagen scaffolds either failed to prevent non-unions <sup>32</sup> or to restore  
325 the mechanical bone properties <sup>33</sup>. The low regeneration potential of collagen scaffolds has  
326 been attributed to a general lack of bioactivity of collagen despite its overall favorable features  
327 such as low antigenicity, high biodegradability and high biocompatibility <sup>27-29</sup>. Furthermore,  
328 studies indicate a high relevance of the pore size in the collagen scaffolds, with smaller pores  
329 potentially being affected by cellular occlusion, and preventing cellular penetration, production  
330 of extracellular matrix and neovascularization of the inner areas of the scaffold <sup>28</sup>. In contrast,  
331 larger pores have been associated with low mechanical scaffold properties and early scaffold  
332 degradation <sup>34,35</sup>. A major limitation of most studies is that they did not include empty defect

333 and positive controls, which would be essential for better understanding of specific changes  
334 in healing patterns mediated by different biomaterials.

335 To further promote bone healing, scaffolds have been incubated in solutions containing  
336 growth factors (e.g. BMP-2, BMP-7; <sup>36,37</sup>). Especially BMP-2 has been widely applied in  
337 preclinical studies to promote healing of critical sized defects (for review see <sup>38</sup>) and in clinical  
338 settings. However, studies reported BMP-2 associated adverse events and complications (e.g.  
339 antibody formation, inflammation, ectopic bone formation, carcinogenicity <sup>39-41</sup>). Therefore,  
340 using low BMP-2 dosages seems crucial in order to avoid adverse effects while preserving its  
341 osteoanabolic potential <sup>42</sup>. So far preclinical studies used a wide range of BMP-2 dosages (0.1-  
342 150.000 µg BMP-2 per defect in small animals as summarized in a comprehensive review by  
343 Gothard et al. <sup>38</sup>). In this study, we therefore down-scaled the BMP-2 dosages from previous  
344 studies (low BMP-2 dosages with beneficial effect on bone healing; 10/75 µg BMP-2 per defect  
345 <sup>43,44</sup>) to the volume of our scaffold (2 µg BMP-2 per defect). Similar to other studies <sup>38</sup>, BMP-  
346 2 application significantly accelerated the healing process leading to early cortical bridging.  
347 However, when looking at the defect sub-volumes separately, we saw that the spatio-  
348 temporal healing pattern largely differed from the physiological healing pattern seen in the  
349 0.9mm group. In the collagen+BMP-2 group the increase in the bone formation rate was  
350 higher but persisted for a shorter amount of time compared to the 0.9mm defect group.  
351 Furthermore, bone formation mainly took place in the periosteal regions and the defect  
352 periphery, whereas in the 0.9mm defect group bone formation was predominantly seen in the  
353 defect center. This supports the assumption that the collagen scaffold itself might have  
354 hindered cells from migrating into the defect center. In line with other studies <sup>30,45</sup>, the  
355 collagen scaffolds were degraded in both groups by the end of the study as shown by absence



356 of collagen fibers in the defect center via Sirius Red staining of histological sections.  
357 Accumulation of fat cells inside the formed cortical shell (unions) or in the defect center (non-  
358 unions) indicated differentiation of mesenchymal stem cells (MSCs) towards the adipogenic  
359 lineage in the later healing period. Concluding from the time-lapsed *in vivo* micro-CT  
360 evaluation, strong BMP-2 induced bone formation associated with osteogenic differentiation  
361 of MSCs was only transiently observed in the early healing period. Removal of the BMP-2  
362 induced stimulus in later healing phases might have caused a change from osteogenic to  
363 adipogenic differentiation of MSCs. This shift might have been further strengthened by stress  
364 shielding of the defect region associated with stiff external fixation <sup>46</sup>.  
365 Our study therefore shows that sub-volume specific characterization of functionalized  
366 biomaterials seems crucial for assessing their bone regeneration potential. The study further  
367 indicates that time-lapsed *in vivo* micro-CT combined with our recently developed two-  
368 threshold density approach should be used in future studies to identify parameters for  
369 prediction of non-unions in early healing phases. Via registration of consecutive scans as  
370 described recently, we were able to precisely characterize and understand which spatio-  
371 temporal deviations led to non-union formation and how this was prevented by BMP-2  
372 application. Using collagen and BMP-2 as test materials, the time-lapsed *in vivo* micro-CT-  
373 based monitoring approach was shown to be suitable for spatio-temporal assessment of callus  
374 formation and remodelling patterns and could be used in future studies to characterize and  
375 precisely understand the regeneration capacity of functionalized biomaterials.  
376 The current study has several limitations. We did not track the degradation of the collagen  
377 scaffolds over time and only performed end-point histological assessment of collagen  
378 residuals via Sirius Red staining. Future studies should apply fluorescent biomaterials and

379 reporters, which could be visualized via *in vivo* optical imaging<sup>47-49</sup>. We did also not measure  
380 the BMP-2 release kinetics. This could be similarly achieved via the use of labeled growth  
381 factors<sup>50</sup> in combination with multimodal imaging (e.g. optical imaging, PET, SPECT, micro-  
382 CT)<sup>17,51</sup>. Furthermore, in order to reliably create critical-sized defects, the defect size would  
383 need to be increased by ca. 25% in future studies.

384 Nevertheless, application of time-lapsed *in vivo* micro-CT allows faster and more precise  
385 evaluation of biomaterials for bone regeneration, thereby also reducing the animal numbers  
386 involved according to the 3R's of animal welfare. It could further be used for early prediction  
387 of non-union formation and identification of biomarkers. The approach could be  
388 supplemented with the registration of 2D-histology section into the 3D-micro-CT volume<sup>52</sup>,  
389 potentially allowing for a spatio-temporal understanding of molecular and cellular changes  
390 induced by different biomaterials. To better mimic the clinical situation, future studies should  
391 also assess the performance of biomaterials under load application, which could be achieved  
392 using a recently developed loading fixator<sup>53</sup>. By combining our *in vivo* time-lapsed micro-CT  
393 based monitoring approach with individualized loading regimes, this would allow for thorough  
394 characterization of biomaterials under clinically relevant loading conditions.

395 To conclude, *in vivo* time-lapsed micro-CT allows (1) spatio-temporal discrimination between  
396 normal and disturbed healing patterns relevant for the detection of distinct features  
397 associated with different medical conditions and (2) spatio-temporal characterization of the  
398 bone regeneration capacity of functionalized biomaterials.

399

## 400 **Materials and Methods**

### 401 **Animals**

402 All animal procedures were approved by the local authorities (license number: 36/2014;  
403 Kantonales Veterinäramt Zürich, Zurich, Switzerland). We confirm that all methods were  
404 carried out in accordance with relevant guidelines and regulations (Swiss Animal Welfare Act  
405 and Ordinance (TSchG, TSchV)) and reported considering ARRIVE guidelines. Female 12 week-  
406 old C57BL/6J mice were purchased from Janvier (Saint Berthevin Cedex, France) and housed  
407 in the animal facility of the ETH Phenomics Center (EPIC; 12h:12h light-dark cycle,  
408 maintenance feed (3437, KLIBA NAFAG, Kaiseraugst, Switzerland), 5 animals/cage). At an age  
409 of 20 weeks, all animals received a femur defect. In Experiment 1, one group of animals  
410 received a small defect (defect length:  $0.86\pm 0.09\text{mm}$ ,  $n=10$ ) and a second group received a  
411 large defect (defect length:  $2.00\pm 0.19\text{mm}$ ,  $n=8$ ; housing after surgery: 2-3 animals/cage). In  
412 Experiment 2 both groups received a 2mm femur defect with application of either collagen  
413 scaffolds ( $d=2\text{mm}$ ,  $h=2\text{mm}$ ; ILS, Saint Priest, France;  $n=8$ ) or collagen scaffolds+BMP-2  
414 ( $2.5\mu\text{g/scaffold}$ ; PeproTech, London, UK;  $n=8$ ). Perioperative analgesia (25 mg/L, Tramal®,  
415 Gruenenthal GmbH, Aachen, Germany) was provided via the drinking water two days before  
416 surgery until the third postoperative day. For surgery and micro-CT scans, animals were  
417 anesthetized with isoflurane (induction/maintenance: 5%/1-2% isoflurane/oxygen).

418

#### 419 **Femur defect**

420 An external fixator (Mouse ExFix, RISystem, Davos, Switzerland; stiffness:  $24\text{N/mm}^{21}$ ) was  
421 positioned at the craniolateral aspect of the right femur and attached using four mounting  
422 pins. First, the most distal pin was inserted approximately 2mm proximal to the growth plate,  
423 followed by placement of the most proximal and the inner pins. Subsequently, a femur defect  
424 was created using 1 and 2 Gigli wire saws for the small and the large defect, respectively.

425

426 **Time-lapsed *in vivo* micro-CT**

427 Immediate post-surgery correct positioning of the fixator and the defect was visualized using  
428 a vivaCT 40 (Scanco Medical AG, Brüttisellen, Switzerland) (isotropic nominal resolution: 10.5  
429  $\mu\text{m}$ ; 55 kVp, 145  $\mu\text{A}$ , 350 ms integration time, 500 projections per 180°, 21 mm field of view  
430 (FOV), scan duration ca. 15 min). Subsequently, the defect region as well as the adjacent cortex  
431 were scanned weekly (week 1-6) with the same settings and morphometric indices and  
432 mineralization progression were determined in four volumes of interest (for details on  
433 methods see <sup>21,22</sup>): defect center (DC), defect periphery (DP), cortical fragment center (FC),  
434 and fragment periphery (FP). Data were normalized to the central VOIs: DC/DC, DP/DC, FC/FC,  
435 FP/FC. Cortical bridging was assessed as previously described in <sup>22</sup>.

436

437 **Animations**

438 To further visualize the defect healing process and the VOIs involved, 3-dimensional computer  
439 renderings were created from the time-lapsed micro-CT data for one mouse in each respective  
440 group across both experiments (0.9mm defect group, 2.0mm defect group, collagen scaffold,  
441 collagen scaffold+BMP-2), then animated and captioned to create videos (Supplementary  
442 Video 1, Supplementary Video 2). Bone mineral density data was single-value thresholded  
443 ( $\text{BMD} = 395 \text{ mg HA/cm}^3$ ) at each time point to create a binary array, simplifying the rendering  
444 process. This binarized bone location data was interpolated using a Euclidean Distance  
445 Transform, generating data for time points in between each weekly measurement. This data  
446 was used to create smooth, animated transitions from one measurement to the next, for  
447 visualization purposes, and was not used in any analysis. To indicate bone formation and

448 resorption between each time point, bone remodelling data from the time-lapsed *in vivo*  
449 micro-CT method was taken <sup>21</sup>. Depictions of the VOIs were rendered directly from their  
450 location data used in this approach. All renderings of the 3D data were performed in ParaView  
451 (Kitware, Version 5.6; Clifton Park, NY). All numerical analysis used for the animations was  
452 done using custom Python 3 scripts. Video editing and captioning was done in Hitfilm Express  
453 (FXhome, Version 13; Norwich, UK).

454

### 455 **Histology**

456 To exemplarily visualize the defect region, histology was performed in 1-2 animals/group. On  
457 day 42 femurs were excised, the femoral head was removed, and the samples were placed in  
458 4% neutrally buffered formalin for 24 hours and subsequently decalcified in 12.5% EDTA for  
459 10-14 days. The samples were embedded in paraffin and 4.5 µm longitudinal sections were  
460 stained with Safranin-O/Fast Green: Weigert's iron haematoxylin solution (HT1079, Sigma-  
461 Aldrich, St. Louis, MO) - 4min, 1:10 HCl-acidified 70% ethanol - 10s, tap water - 5min, 0.02%  
462 Fast Green (F7258, Sigma-Aldrich, St. Louis, MO) - 3min, 1% acetic acid - 10s, 0.1% Safranin-  
463 O (84120, Fluka, St. Louis, MO) - 5min. In order to visualize remnants of the collagen scaffolds,  
464 Sirius Red staining was performed in 1 animal from the collagen and 1 animal from the  
465 collagen+BMP-2 group. For comparison, we also stained sections of the original collagen  
466 matrix with Sirius-Red: Weigert's iron haematoxylin solution (HT1079, Sigma-Aldrich, St. Louis,  
467 MO) - 8min, tap water - 10min, 1:9 Picro-Sirius Red solution (Picric acid: 80456, Fluka, St. Louis,  
468 MO; Direct Red 80: AB133584, ABCR, Karlsruhe, Germany) - 1h, 5% acetic acid 2x10s. For both  
469 stainings, images were taken with Slide Scanner Panoramic 250 (3D Histech, Budapest,  
470 Hungary) at 20x magnification.

471

472 **Statistics**

473 CT analysis: Data were tested for normal distribution (Shapiro-Wilk-Test) and homogeneity of  
474 variance (Levene-Test). Depending on the test outcome, group comparisons of data derived  
475 at single time points were done by Student's t-test or Mann-Whitney U-tests (IBM SPSS  
476 Statistics Version 23). For statistical evaluation of repeated measurements two-way ANOVA  
477 with Geisser-Greenhouse correction and Bonferroni correction (GraphPad Prism 8) were  
478 performed. The level of significance was set at  $p < 0.05$ .

479

480 **Author Contributions Statement**

481 The study was designed by E.W., G.A.K., S.H. and R.M.. The *in vivo* experiments were  
482 performed by E.W., G.A.K. and E.F.. Histological stainings were performed by E.W. and M.H.N..  
483 Data analyses were performed by E.W. and D.C.T.B.. Illustrations of VOIs and animations on  
484 callus formation and remodelling were made by B.J.S.. The manuscript was written by E.W.  
485 and reviewed and approved by all authors.

486

487 **Data availability**

488 All necessary data generated or analyzed during the present study are included in this  
489 published article and its Supplementary Information files (preprint available on BioRxiv  
490 (BIORXIV/2020.10.02.324061). Additional information related to this paper may be requested  
491 from the authors.

492

493 **Competing Interests**

494 The authors declare no competing interests.

495

496 **Acknowledgements**

497 The authors gratefully acknowledge support from the EU (BIODESIGN FP7-NMP-2012-262948  
498 and ERC Advanced MechAGE ERC-2016-ADG-741883). E. Wehrle received funding from the  
499 ETH Postdoctoral Fellowship Program (MSCA-COFUND, FEL-25\_15-1).

500

501 **References**

- 502 1 Giannoudis, P., Tzioupis, C., Almalki, T. & Buckley, R. Fracture healing in osteoporotic fractures:  
503 is it really different? A basic science perspective. *Injury* **38 Suppl 1**, S90-99,  
504 doi:10.1016/j.injury.2007.02.014 (2007).
- 505 2 Syed, A. A., Agarwal, M., Giannoudis, P. V., Matthews, S. J. E. & Smith, R. M. Distal femoral  
506 fractures: long-term outcome following stabilisation with the LISS. *Injury-International Journal*  
507 *of the Care of the Injured* **35**, 599-607, doi:10.1016/S0020-1383(03)00247-X (2004).
- 508 3 Winkler, T., Sass, F. A., Duda, G. N. & Schmidt-Bleek, K. A review of biomaterials in bone defect  
509 healing, remaining shortcomings and future opportunities for bone tissue engineering THE  
510 UNSOLVED CHALLENGE. *Bone Joint Res* **7**, 232-243, doi:10.1302/2046-3758.73.Bjr-2017-  
511 0270.R1 (2018).
- 512 4 Przekora, A. The summary of the most important cell-biomaterial interactions that need to be  
513 considered during in vitro biocompatibility testing of bone scaffolds for tissue engineering  
514 applications. *Mat Sci Eng C-Mater* **97**, 1036-1051, doi:10.1016/j.msec.2019.01.061 (2019).
- 515 5 Stevens, M. M. Biomaterials for bone tissue engineering. *Mater Today* **11**, 18-25, doi:Doi  
516 10.1016/S1369-7021(08)70086-5 (2008).
- 517 6 Hulsart-Billstrom, G. *et al.* A Surprisingly Poor Correlation between in Vitro and in Vivo Testing  
518 of Biomaterials for Bone Regeneration: Results of a Multicentre Analysis. *Eur Cells Mater* **31**,  
519 312-322, doi:10.22203/eCM.v031a20 (2016).
- 520 7 Pearce, A. I., Richards, R. G., Milz, S., Schneider, E. & Pearce, S. G. Animal models for implant  
521 biomaterial research in bone: A review. *Eur Cells Mater* **13**, 1-10 (2007).
- 522 8 Peric, M. *et al.* The rational use of animal models in the evaluation of novel bone regenerative  
523 therapies. *Bone* **70**, 73-86, doi:10.1016/j.bone.2014.07.010 (2015).

- 524 9 Gomes, P. S. & Fernandes, M. H. Rodent models in bone-related research: the relevance of  
525 calvarial defects in the assessment of bone regeneration strategies. *Lab Anim-Uk* **45**, 14-24,  
526 doi:10.1258/la.2010.010085 (2011).
- 527 10 Harris, J. S., Bemenderfer, T. B., Wessel, A. R. & Kacena, M. A. A review of mouse critical size  
528 defect models in weight bearing bones. *Bone* **55**, 241-247, doi:10.1016/j.bone.2013.02.002  
529 (2013).
- 530 11 Holstein, J. H. *et al.* Mouse Models for the Study of Fracture Healing and Bone Regeneration.  
531 *Osteoporosis Research: Animal Models*, 175-191, doi:10.1007/978-0-85729-293-3\_14 (2011).
- 532 12 Horner, E. A. *et al.* Long Bone Defect Models for Tissue Engineering Applications: Criteria for  
533 Choice. *Tissue Eng Part B-Re* **16**, 263-271, doi:10.1089/ten.teb.2009.0224 (2010).
- 534 13 van Griensven, M. Preclinical testing of drug delivery systems to bone. *Adv Drug Deliver Rev*  
535 **94**, 151-164, doi:10.1016/j.addr.2015.07.006 (2015).
- 536 14 Gauthier, O. *et al.* In vivo bone regeneration with injectable calcium phosphate biomaterial: A  
537 three-dimensional micro-computed tomographic, biomechanical and SEM study. *Biomaterials*  
538 **26**, 5444-5453, doi:10.1016/j.biomaterials.2005.01.072 (2005).
- 539 15 Martino, M. *et al.* Growth factors engineered for super-affinity to extracellular matrix enhance  
540 tissue healing. *J Tissue Eng Regen M* **8**, 35-36 (2014).
- 541 16 Meinel, L. *et al.* Silk based biomaterials to heal critical sized femur defects. *Bone* **39**, 922-931,  
542 doi:10.1016/j.bone.2006.04.019 (2006).
- 543 17 Lienemann, P. S. *et al.* Longitudinal in vivo evaluation of bone regeneration by combined  
544 measurement of multi-pinhole SPECT and micro-CT for tissue engineering (vol 5, 10238, 2015).  
545 *Sci Rep-Uk* **5**, doi:ARTN 1239110.1038/srep12391 (2015).
- 546 18 van Lenthe, G. H. *et al.* Nondestructive micro-computed tomography for biological imaging  
547 and quantification of scaffold-bone interaction in vivo. *Biomaterials* **28**, 2479-2490,  
548 doi:10.1016/j.biomaterials.2007.01.017 (2007).
- 549 19 Boerckel, J. D. *et al.* Effects of protein dose and delivery system on BMP-mediated bone  
550 regeneration. *Biomaterials* **32**, 5241-5251, doi:10.1016/j.biomaterials.2011.03.063 (2011).
- 551 20 Mehta, M., Checa, S., Lienau, J., Hutmacher, D. & Duda, G. N. In Vivo Tracking of Segmental  
552 Bone Defect Healing Reveals That Callus Patterning Is Related to Early Mechanical Stimuli. *Eur*  
553 *Cells Mater* **24**, 358-371, doi:DOI 10.22203/eCM.v024a26 (2012).
- 554 21 Tourolle né Betts, D. C., Wehrle, E., Paul, G. R., Kuhn, G. A., Christen, P., Hofmann, S. & Müller,  
555 R. The association between mineralised tissue formation and the mechanical local in vivo  
556 environment: Time-lapsed quantification of a mouse defect healing model. *Sci Rep-Uk* **10**,  
557 1100, doi:doi: <https://doi.org/10.1038/s41598-020-57461-5> (2020).
- 558 22 Wehrle, E., Tourolle né Betts, D. C., Kuhn, G. A., Scheuren, A.C., Hofmann, S. & Müller, R.  
559 Evaluation of longitudinal time-lapsed in vivo micro-CT for monitoring fracture healing in  
560 mouse femur defect models. *Sci Rep-Uk* **9**, 17445, doi:doi: <https://doi.org/10.1038/s41598-019-53822-x> (2019).
- 562 23 Zwingenberger, S. *et al.* Establishment of a femoral critical-size bone defect model in  
563 immunodeficient mice. *J Surg Res* **181**, E7-E14, doi:10.1016/j.jss.2012.06.039 (2013).
- 564 24 Borgiani, E. *et al.* Age-Related Changes in the Mechanical Regulation of Bone Healing Are  
565 Explained by Altered Cellular Mechanoreponse. *J Bone Miner Res*, doi:10.1002/jbmr.3801  
566 (2019).
- 567 25 Al-Tamimi, A. A., Peach, C., Fernandes, P. R., Cseke, A. & Bartolo, P. J. D. S. Topology  
568 Optimization to reduce the stress shielding effect for orthopedic applications. *Proc Cirp* **65**,  
569 202-206, doi:10.1016/j.procir.2017.04.032 (2017).
- 570 26 Boby, J. D. *et al.* The effect of stem stiffness on femoral bone resorption after canine porous-  
571 coated total hip arthroplasty. *Clin Orthop Relat Res*, 196-213 (1990).



- 572 27 Zhang, D. W., Wu, X. W., Chen, J. D. & Lin, K. L. The development of collagen based composite  
573 scaffolds for bone regeneration. *Bioact Mater* **3**, 129-138,  
574 doi:10.1016/j.bioactmat.2017.08.004 (2018).
- 575 28 Ferreira, A. M., Gentile, P., Chiono, V. & Ciardelli, G. Collagen for bone tissue regeneration.  
576 *Acta Biomater* **8**, 3191-3200, doi:10.1016/j.actbio.2012.06.014 (2012).
- 577 29 Glowacki, J. & Mizuno, S. Collagen scaffolds for tissue engineering. *Biopolymers* **89**, 338-344,  
578 doi:10.1002/bip.20871 (2008).
- 579 30 Hertweck, J. *et al.* CD34(+) cells seeded in collagen scaffolds promote bone formation in a  
580 mouse calvarial defect model. *J Biomed Mater Res B Appl Biomater* **106**, 1505-1516,  
581 doi:10.1002/jbm.b.33956 (2018).
- 582 31 Stuckensen, K. *et al.* Anisotropic Cryostructured Collagen Scaffolds for Efficient Delivery of  
583 RhBMP-2 and Enhanced Bone Regeneration. *Materials (Basel)* **12**, doi:10.3390/ma12193105  
584 (2019).
- 585 32 Cipitria, A. *et al.* BMP delivery complements the guiding effect of scaffold architecture without  
586 altering bone microstructure in critical-sized long bone defects: A multiscale analysis. *Acta*  
587 *Biomater* **23**, 282-294, doi:10.1016/j.actbio.2015.05.015 (2015).
- 588 33 Sarkar, M. R. *et al.* Bone formation in a long bone defect model using a platelet-rich plasma-  
589 loaded collagen scaffold. *Biomaterials* **27**, 1817-1823, doi:10.1016/j.biomaterials.2005.10.039  
590 (2006).
- 591 34 Karageorgiou, V. & Kaplan, D. Porosity of 3D biomaterial scaffolds and osteogenesis.  
592 *Biomaterials* **26**, 5474-5491, doi:10.1016/j.biomaterials.2005.02.002 (2005).
- 593 35 Luo, Z. W. *et al.* Effect of Pore Size on the Biodegradation Rate of Silk Fibroin Scaffolds. *Adv*  
594 *Mater Sci Eng*, doi:Artn 31539710.1155/2015/315397 (2015).
- 595 36 Begam, H., Nandi, S. K., Kundu, B. & Chanda, A. Strategies for delivering bone morphogenetic  
596 protein for bone healing. *Mat Sci Eng C-Mater* **70**, 856-869, doi:10.1016/j.msec.2016.09.074  
597 (2017).
- 598 37 Salazar, V. S., Gamer, L. W. & Rosen, V. BMP signalling in skeletal development, disease and  
599 repair. *Nat Rev Endocrinol* **12**, 203-221, doi:10.1038/nrendo.2016.12 (2016).
- 600 38 Gothard, D. *et al.* Tissue Engineered Bone Using Select Growth Factors: A Comprehensive  
601 Review of Animal Studies and Clinical Translation Studies in Man. *Eur Cells Mater* **28**, 166-208,  
602 doi:DOI 10.22203/eCM.v028a13 (2014).
- 603 39 James, A. W. *et al.* A Review of the Clinical Side Effects of Bone Morphogenetic Protein-2.  
604 *Tissue Eng Part B-Re* **22**, 284-297, doi:10.1089/ten.teb.2015.0357 (2016).
- 605 40 Skovrlj, B. *et al.* Association Between BMP-2 and Carcinogenicity. *Spine* **40**, 1862-1871,  
606 doi:10.1097/Brs.0000000000001126 (2015).
- 607 41 Tannoury, C. A. & An, H. S. Complications with the use of bone morphogenetic protein 2 (BMP-  
608 2) in spine surgery. *Spine J* **14**, 552-559, doi:10.1016/j.spinee.2013.08.060 (2014).
- 609 42 Schmidt-Bleek, K., Willie, B. M., Schwabe, P., Seemann, P. & Duda, G. N. BMPs in bone  
610 regeneration: Less is more effective, a paradigm-shift. *Cytokine Growth F R* **27**, 141-148,  
611 doi:10.1016/j.cytogfr.2015.11.006 (2016).
- 612 43 Karageorgiou, V. *et al.* Porous silk fibroin 3-D scaffolds for delivery of bone morphogenetic  
613 protein-2 in vitro and in vivo. *J Biomed Mater Res A* **78**, 324-334, doi:10.1002/jbm.a.30728  
614 (2006).
- 615 44 Zhang, W. *et al.* VEGF and BMP-2 promote bone regeneration by facilitating bone marrow stem  
616 cell homing and differentiation. *Eur Cell Mater* **27**, 1-11; discussion 11-12,  
617 doi:10.22203/ecm.v027a01 (2014).
- 618 45 Hollinger, J. O. *et al.* Recombinant human bone morphogenetic protein-2 and collagen for  
619 bone regeneration. *J Biomed Mater Res* **43**, 356-364, doi:10.1002/(sici)1097-  
620 4636(199824)43:4<356::aid-jbm3>3.0.co;2-7 (1998).

- 621 46 Herberg, S. *et al.* Combinatorial morphogenetic and mechanical cues to mimic bone  
622 development for defect repair. *Sci Adv* **5**, doi:ARTN eaax247610.1126/sciadv.aax2476 (2019).  
623 47 Fragogeorgi, E. A. *et al.* In vivo imaging techniques for bone tissue engineering. *J Tissue Eng* **10**,  
624 doi:Artn 204173141985458610.1177/2041731419854586 (2019).  
625 48 Gil, C. J. *et al.* In Vivo Tracking of Tissue Engineered Constructs. *Micromachines-Basel* **10**,  
626 doi:ARTN 47410.3390/mi10070474 (2019).  
627 49 Li, K. & Liu, B. Polymer-encapsulated organic nanoparticles for fluorescence and photoacoustic  
628 imaging. *Chem Soc Rev* **43**, 6570-6597, doi:10.1039/c4cs00014e (2014).  
629 50 Mafina, M. K., Sullivan, A. C. & Hing, K. A. Use of a fluorescent probe to monitor the enhanced  
630 affinity of rh-BMP-2 to silicated-calcium phosphate synthetic bone graft substitutes under  
631 competitive conditions. *Mat Sci Eng C-Mater* **80**, 207-212, doi:10.1016/j.msec.2017.05.142  
632 (2017).  
633 51 Hulsart-Billstrom, G. *et al.* Non-invasive tri-modal visualisation via PET/SPECT/mu CT of  
634 recombinant human bone morphogenetic protein-2 retention and associated bone  
635 regeneration: A proof of concept. *J Control Release* **285**, 178-186,  
636 doi:10.1016/j.jconrel.2018.07.012 (2018).  
637 52 Taylor, C., Scheuren, A., Trüssel, A. & Müller R. 3D local in vivo environment (LivE) imaging for  
638 single cell protein analysis of bone tissue. *Current Directions in Biomedical Engineering* **2**  
639 (2016).  
640 53 Wehrle E., Paul G. R., Betts D. C., Kuhn G. A. & Müller R. Individualized cyclic mechanical loading  
641 improves callus properties in novel femur fracture loading model as assessed by time-lapsed  
642 in vivo imaging and real-time micro-finite element analysis. *Trans. Orthop. Res. Soc.* **44**, 1526  
643 (2019).

644

## 645 **Figure legends**

646 **Figure 1.** Representative images (threshold: 645 mg HA/cm<sup>3</sup>) of the defect region from animals  
647 of the 0.9mm group (top) and the 2.0mm group (bottom).  
648 Visualization of bone formation (orange) and resorption (blue) via registration of micro-CT  
649 scans from weeks 1-6 to weeks 0-5.

650 **Figure 2.** Micro-CT based evaluation of bone parameters in the 0.9mm group (blue) and the  
651 2.0mm group (red) using different VOIS: defect center (DC; a-c), defect periphery (DP; d-f),  
652 cortical fragment center (FC; g-i), cortical fragment periphery (FP; j-l). a, d, g, j: Bone formation  
653 rate (solid line) and bone resorption rate (dashed line) given in percent per day. b, e, h, k: Bone  
654 volume (BV) normalized to TV (DC for DC and DP, FC for FC+FP). c, f, i, l: Degree of bone  
655 mineralization given as ratio of bone volume with a density  $\geq 645$  mg HA/cm<sup>3</sup> to the total

656 osseous volume (threshold  $\geq 395$  mg HA/cm<sup>3</sup>). n=7/10; a,d,g,j: \* indicates  $p < 0.05$  between  
657 consecutive weeks; # indicates  $p < 0.05$  between groups. b,c,e,f,h,i,k,l: \* indicates  $p < 0.05$   
658 between groups; # indicates  $p < 0.05$  between consecutive weeks.

659 **Figure 3.** Representative images (threshold: 645 mg HA/cm<sup>3</sup>) of the defect region from animals  
660 of the collagen group (top) and the collagen+BMP-2 group (bottom). Visualization of bone  
661 formation (orange) and resorption (blue) via registration of micro-CT scans from weeks 1-6 to  
662 weeks 0-5.

663 **Figure 4.** Micro-CT based evaluation of bone parameters in the collagen group (blue) and the  
664 collagen+BMP-2 group (red) using different VOIS: defect center (DC; a-c), defect periphery  
665 (DP; d-f), cortical fragment center (FC; g-i), cortical fragment periphery (FP; j-l). a, d, g, j: Bone  
666 formation rate (solid line) and bone resorption rate (dashed line) given in percent per day. b,  
667 e, h, k: Bone volume (BV) normalized to TV (DC for DC and DP, FC for FC+FP). c, f, i, l: Degree  
668 of bone mineralization given as ratio of bone volume with a density  $\geq 645$  mg HA/cm<sup>3</sup> to the  
669 total osseous volume (threshold  $\geq 395$  mg HA/cm<sup>3</sup>). n=7/10; a,d,g,j: \* indicates  $p < 0.05$   
670 between consecutive weeks; # indicates  $p < 0.05$  between groups. b,c,e,f,h,i,k,l: \* indicates  $p$   
671  $< 0.05$  between groups; # indicates  $p < 0.05$  between consecutive weeks.

672 **Figure 5.** Histology of longitudinal sections of fractured femora 6 weeks after defect surgery.  
673 Row 1: Safranin-O staining of 0.9mm and 2.0mm defect groups - overview images, scale bar =  
674 1 mm and area between inner pins of fixator, scale bar = 100  $\mu$ m. Row 2: Safranin-O staining  
675 of collagen and collagen+BMP-2 groups - overview images, scale bar = 1 mm and area between  
676 inner pins of fixator, scale bar = 100  $\mu$ m. Row 3: Sirius-Red staining of collagen and  
677 collagen+BMP-2 groups - overview images, scale bar = 1 mm and area centered between inner

678 pins of fixator, scale bar = 100  $\mu\text{m}$ . Row 4: Sirius-Red staining of defect center of collagen group  
679 and collagen+BMP-2 group, scale bar = 50  $\mu\text{m}$ . Row 5: Sirius-Red staining of original collagen  
680 matrix, scale bar = 500  $\mu\text{m}$  (left image) and 50  $\mu\text{m}$  (right image).

681

682

683

684

685

686 **Tables**

687 **Table 1.** Number of bridged cortices per callus evaluated weekly in two perpendicular planes  
 688 and number of mice with successful fracture healing in the 0.9mm and the 2.0mm defect  
 689 groups ( $\geq 3$  bridged cortices, threshold 395 mg HA/cm<sup>3</sup>).

| Week | Group | Number of bridged cortices |   |   |   |   | Fracture healing outcome |        |
|------|-------|----------------------------|---|---|---|---|--------------------------|--------|
|      |       | 0                          | 1 | 2 | 3 | 4 | Not healed               | Healed |
| 0    | 0.9mm | 10                         | 0 | 0 | 0 | 0 | 10                       | 0      |
|      | 2.0mm | 8                          | 0 | 0 | 0 | 0 | 8                        | 0      |
| 1    | 0.9mm | 10                         | 0 | 0 | 0 | 0 | 10                       | 0      |
|      | 2.0mm | 8                          | 0 | 0 | 0 | 0 | 8                        | 0      |
| 2    | 0.9mm | 7                          | 3 | 0 | 0 | 0 | 10                       | 0      |
|      | 2.0mm | 8                          | 0 | 0 | 0 | 0 | 10                       | 0      |
| 3    | 0.9mm | 1                          | 0 | 2 | 6 | 1 | 3                        | 7      |
|      | 2.0mm | 7                          | 1 | 0 | 0 | 0 | 8                        | 0      |
| 4    | 0.9mm | 1                          | 0 | 1 | 5 | 3 | 2                        | 8      |
|      | 2.0mm | 7                          | 0 | 0 | 1 | 0 | 7                        | 1      |
| 5    | 0.9mm | 1                          | 0 | 0 | 4 | 5 | 1                        | 9      |
|      | 2.0mm | 7                          | 0 | 0 | 1 | 0 | 7                        | 1      |
| 6    | 0.9mm | 1                          | 0 | 0 | 4 | 5 | 1                        | 9      |
|      | 2.0mm | 7                          | 0 | 0 | 1 | 0 | 7                        | 1      |

690

691

692

693

694

695 **Table 2.** Number of bridged cortices per callus evaluated weekly in two perpendicular planes  
 696 and number of mice with successful fracture healing in the collagen and the collagen+BMP-2  
 697 groups ( $\geq 3$  bridged cortices, threshold 395 mg HA/cm<sup>3</sup>).

698

| Week | Group        | Number of bridged cortices |   |   |   |   | Fracture healing outcome |        |
|------|--------------|----------------------------|---|---|---|---|--------------------------|--------|
|      |              | 0                          | 1 | 2 | 3 | 4 | Not healed               | Healed |
| 0    | collagen     | 8                          | 0 | 0 | 0 | 0 | 8                        | 0      |
|      | collagen+BMP | 8                          | 0 | 0 | 0 | 0 | 8                        | 0      |
| 1    | collagen     | 8                          | 0 | 0 | 0 | 0 | 8                        | 0      |
|      | collagen+BMP | 8                          | 0 | 0 | 0 | 0 | 8                        | 0      |
| 2    | collagen     | 7                          | 0 | 1 | 0 | 0 | 8                        | 0      |
|      | collagen+BMP | 0                          | 0 | 0 | 0 | 8 | 0                        | 8      |
| 3    | collagen     | 7                          | 0 | 0 | 1 | 0 | 7                        | 1      |
|      | collagen+BMP | 0                          | 0 | 0 | 0 | 8 | 0                        | 8      |
| 4    | collagen     | 7                          | 0 | 0 | 1 | 0 | 7                        | 1      |
|      | collagen+BMP | 0                          | 0 | 0 | 0 | 8 | 0                        | 8      |
| 5    | collagen     | 7                          | 0 | 0 | 1 | 0 | 7                        | 1      |
|      | collagen+BMP | 0                          | 0 | 0 | 0 | 8 | 0                        | 8      |
| 6    | collagen     | 7                          | 0 | 0 | 1 | 0 | 7                        | 1      |
|      | collagen+BMP | 0                          | 0 | 0 | 0 | 8 | 0                        | 8      |

699

700



Figure 1

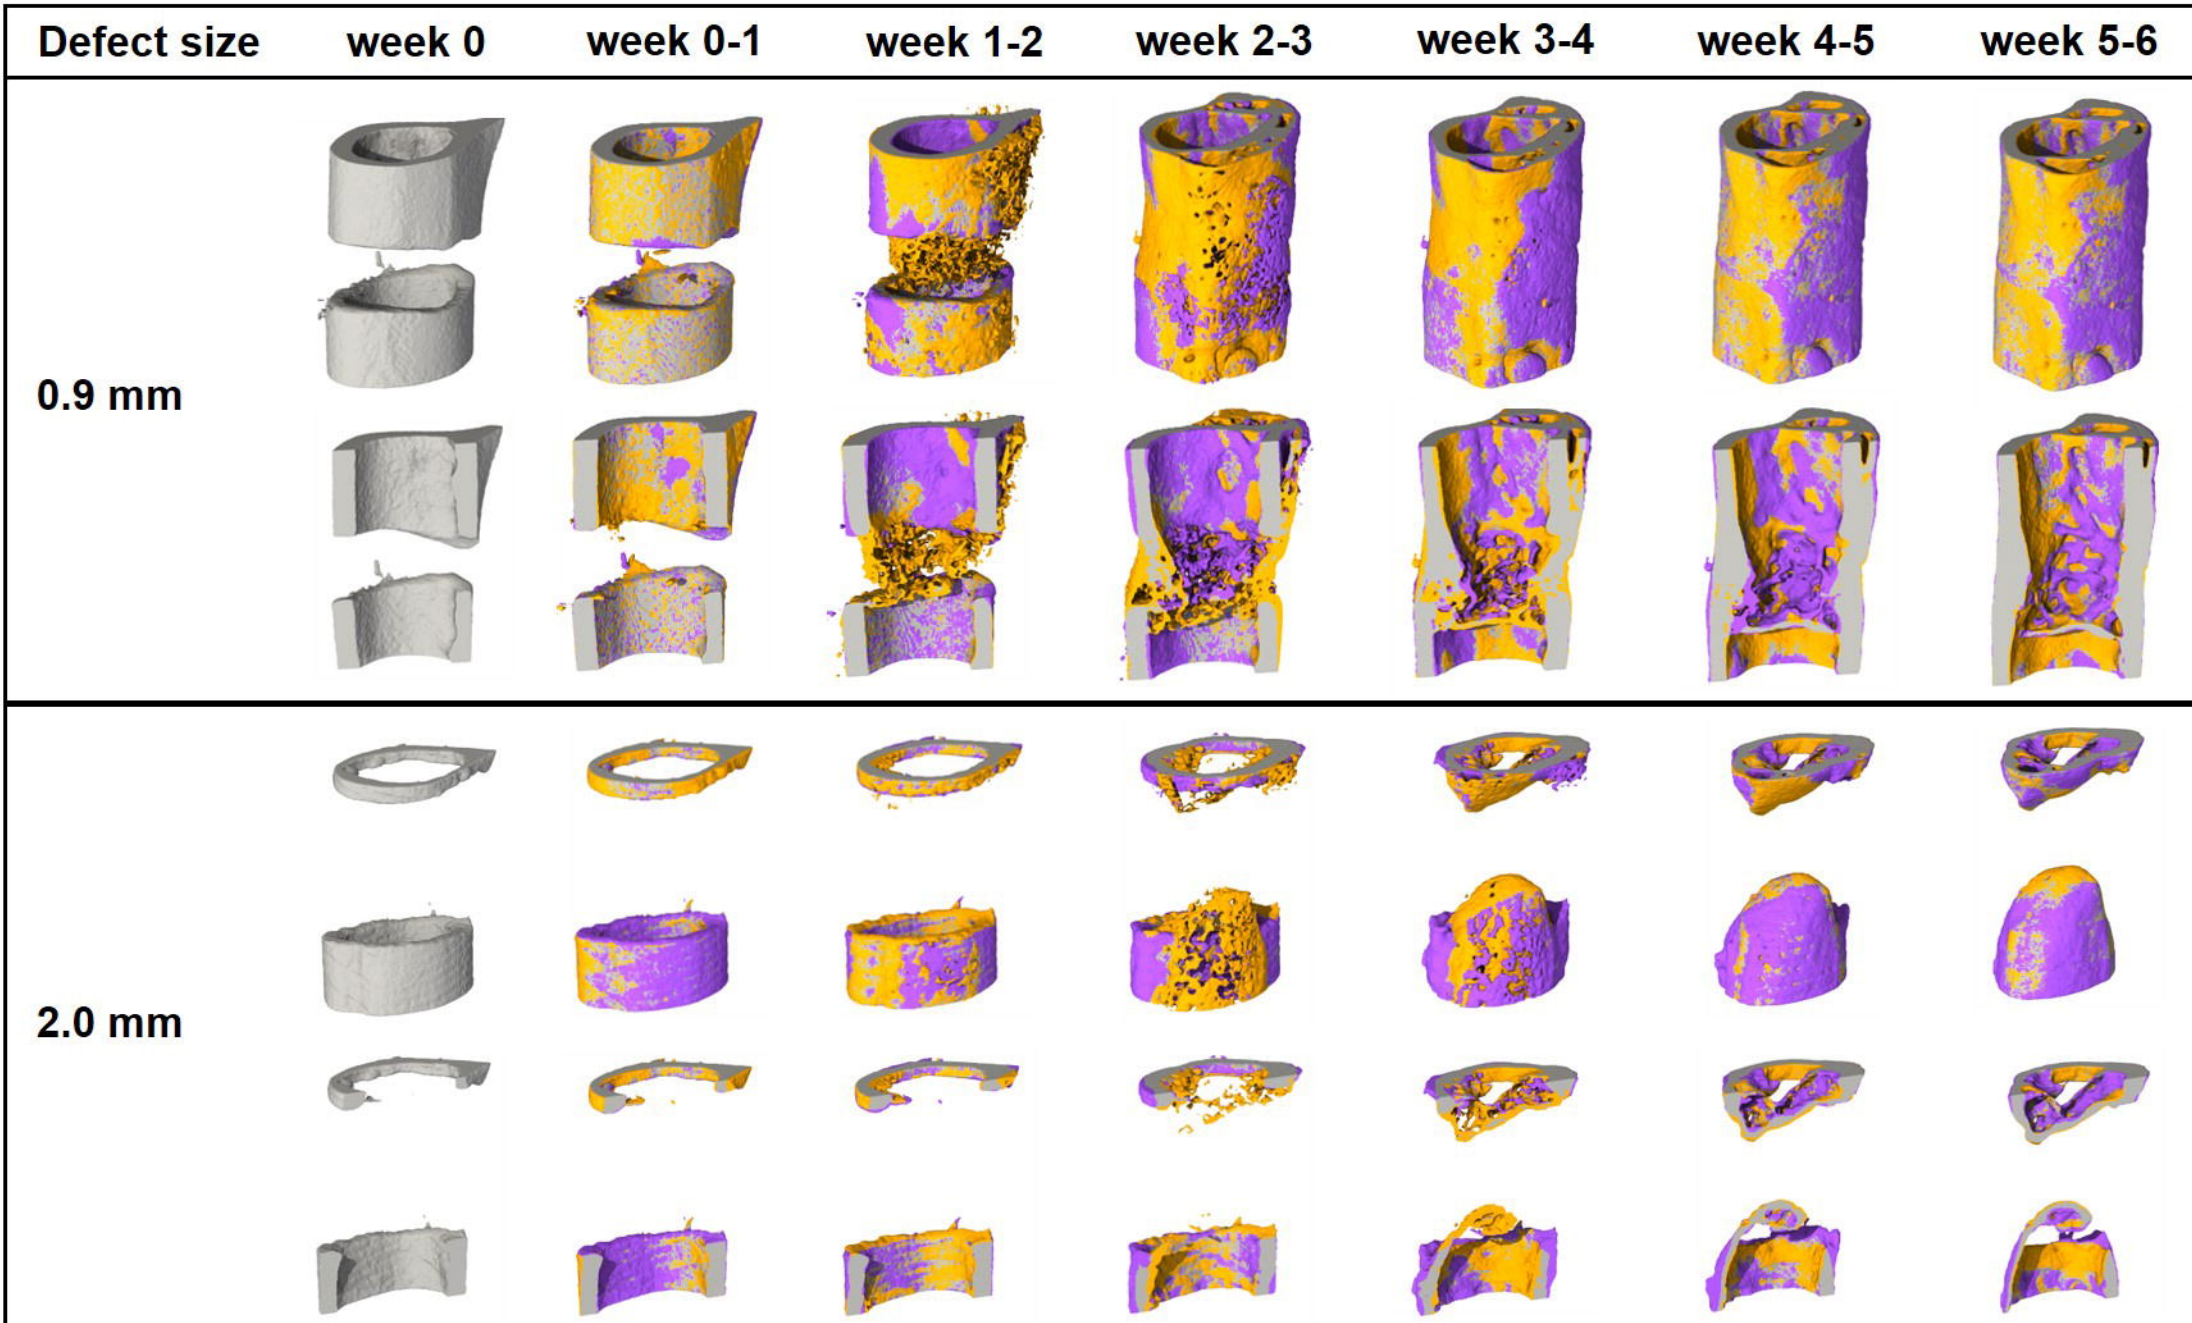

**Figure 2**

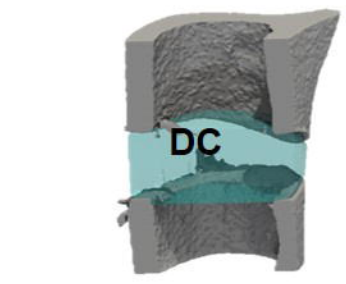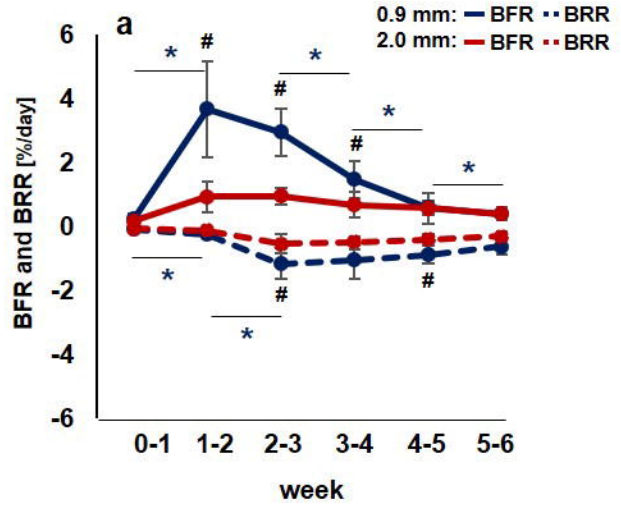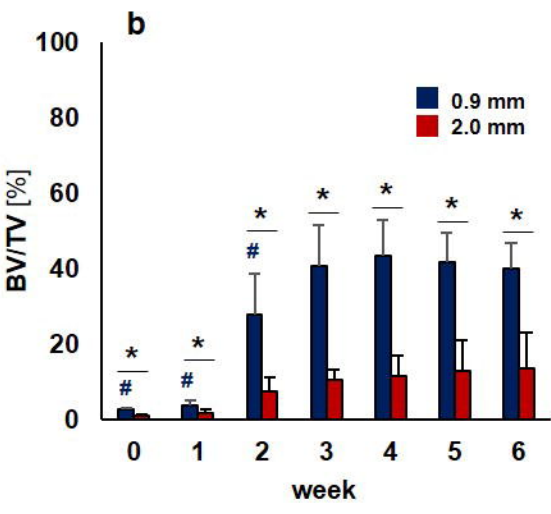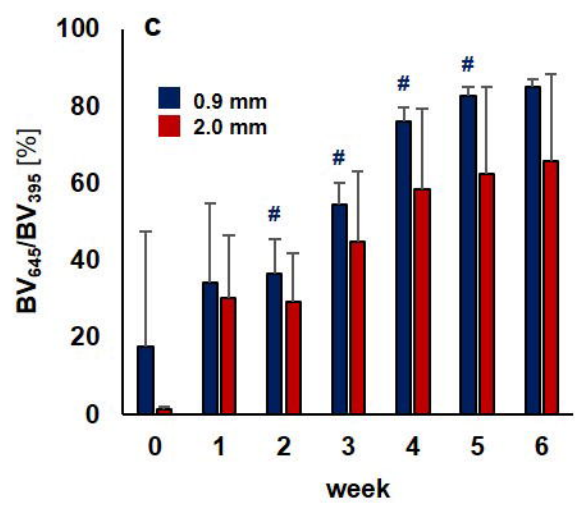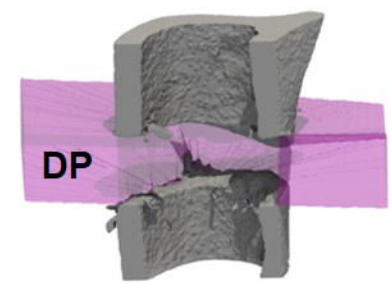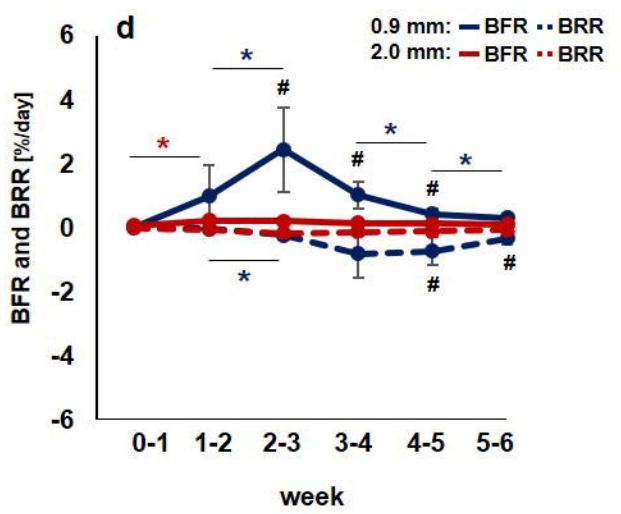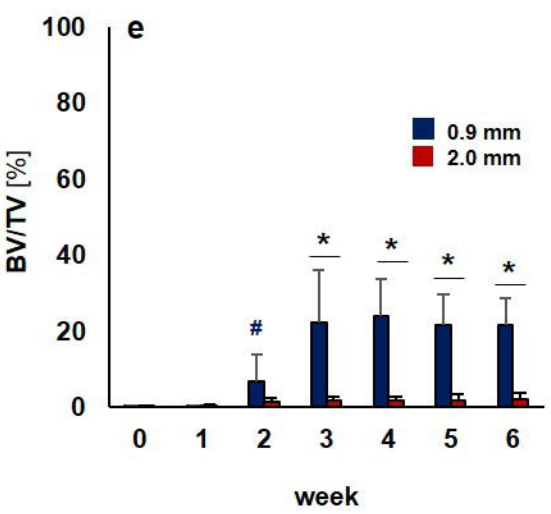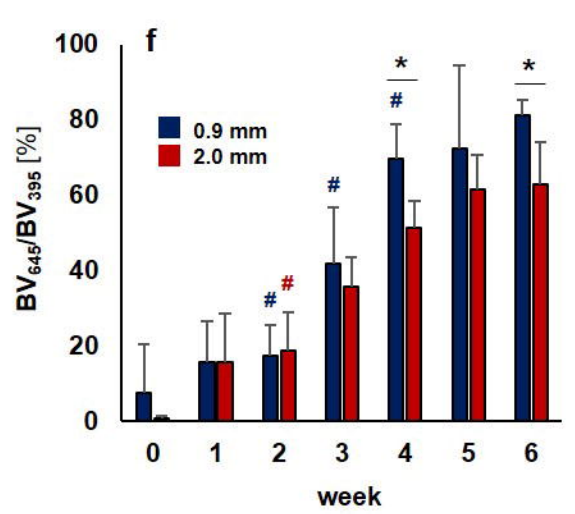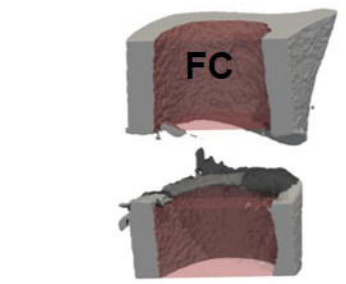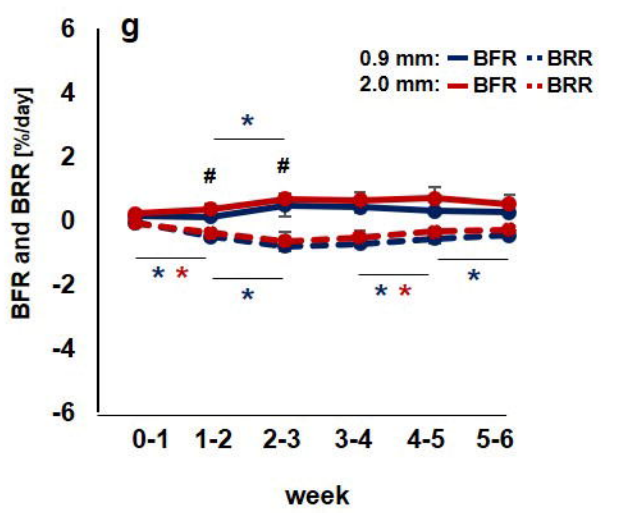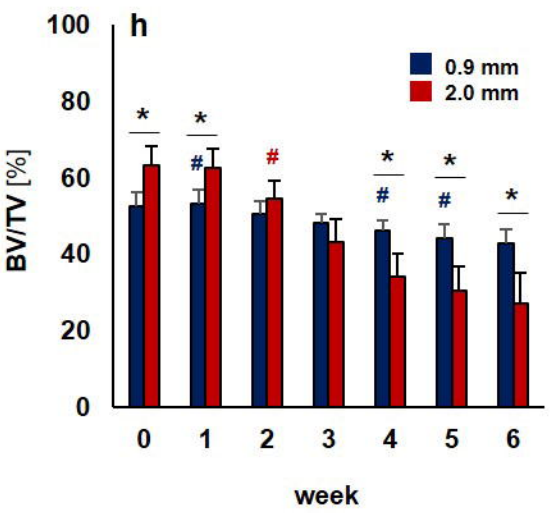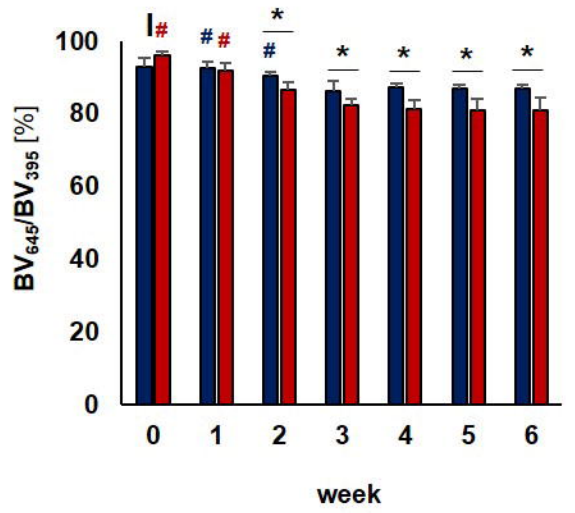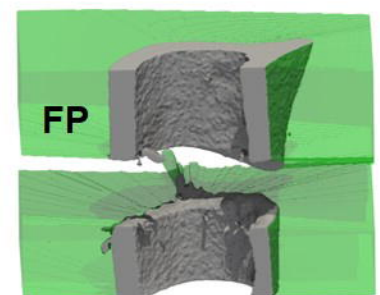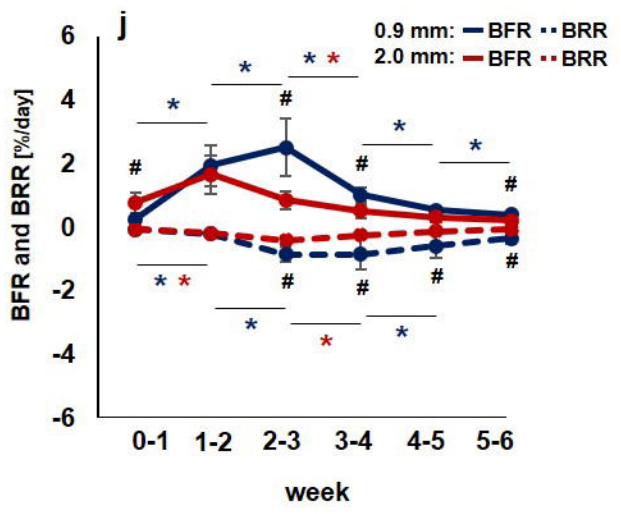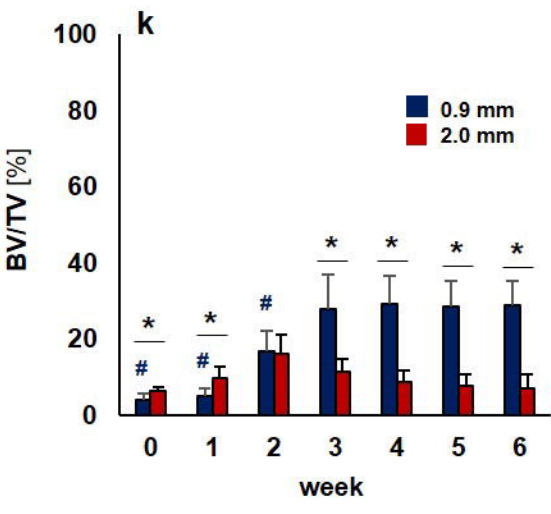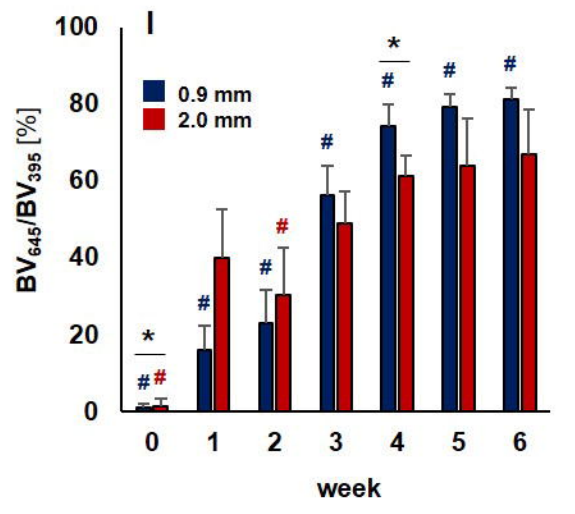



Figure 3

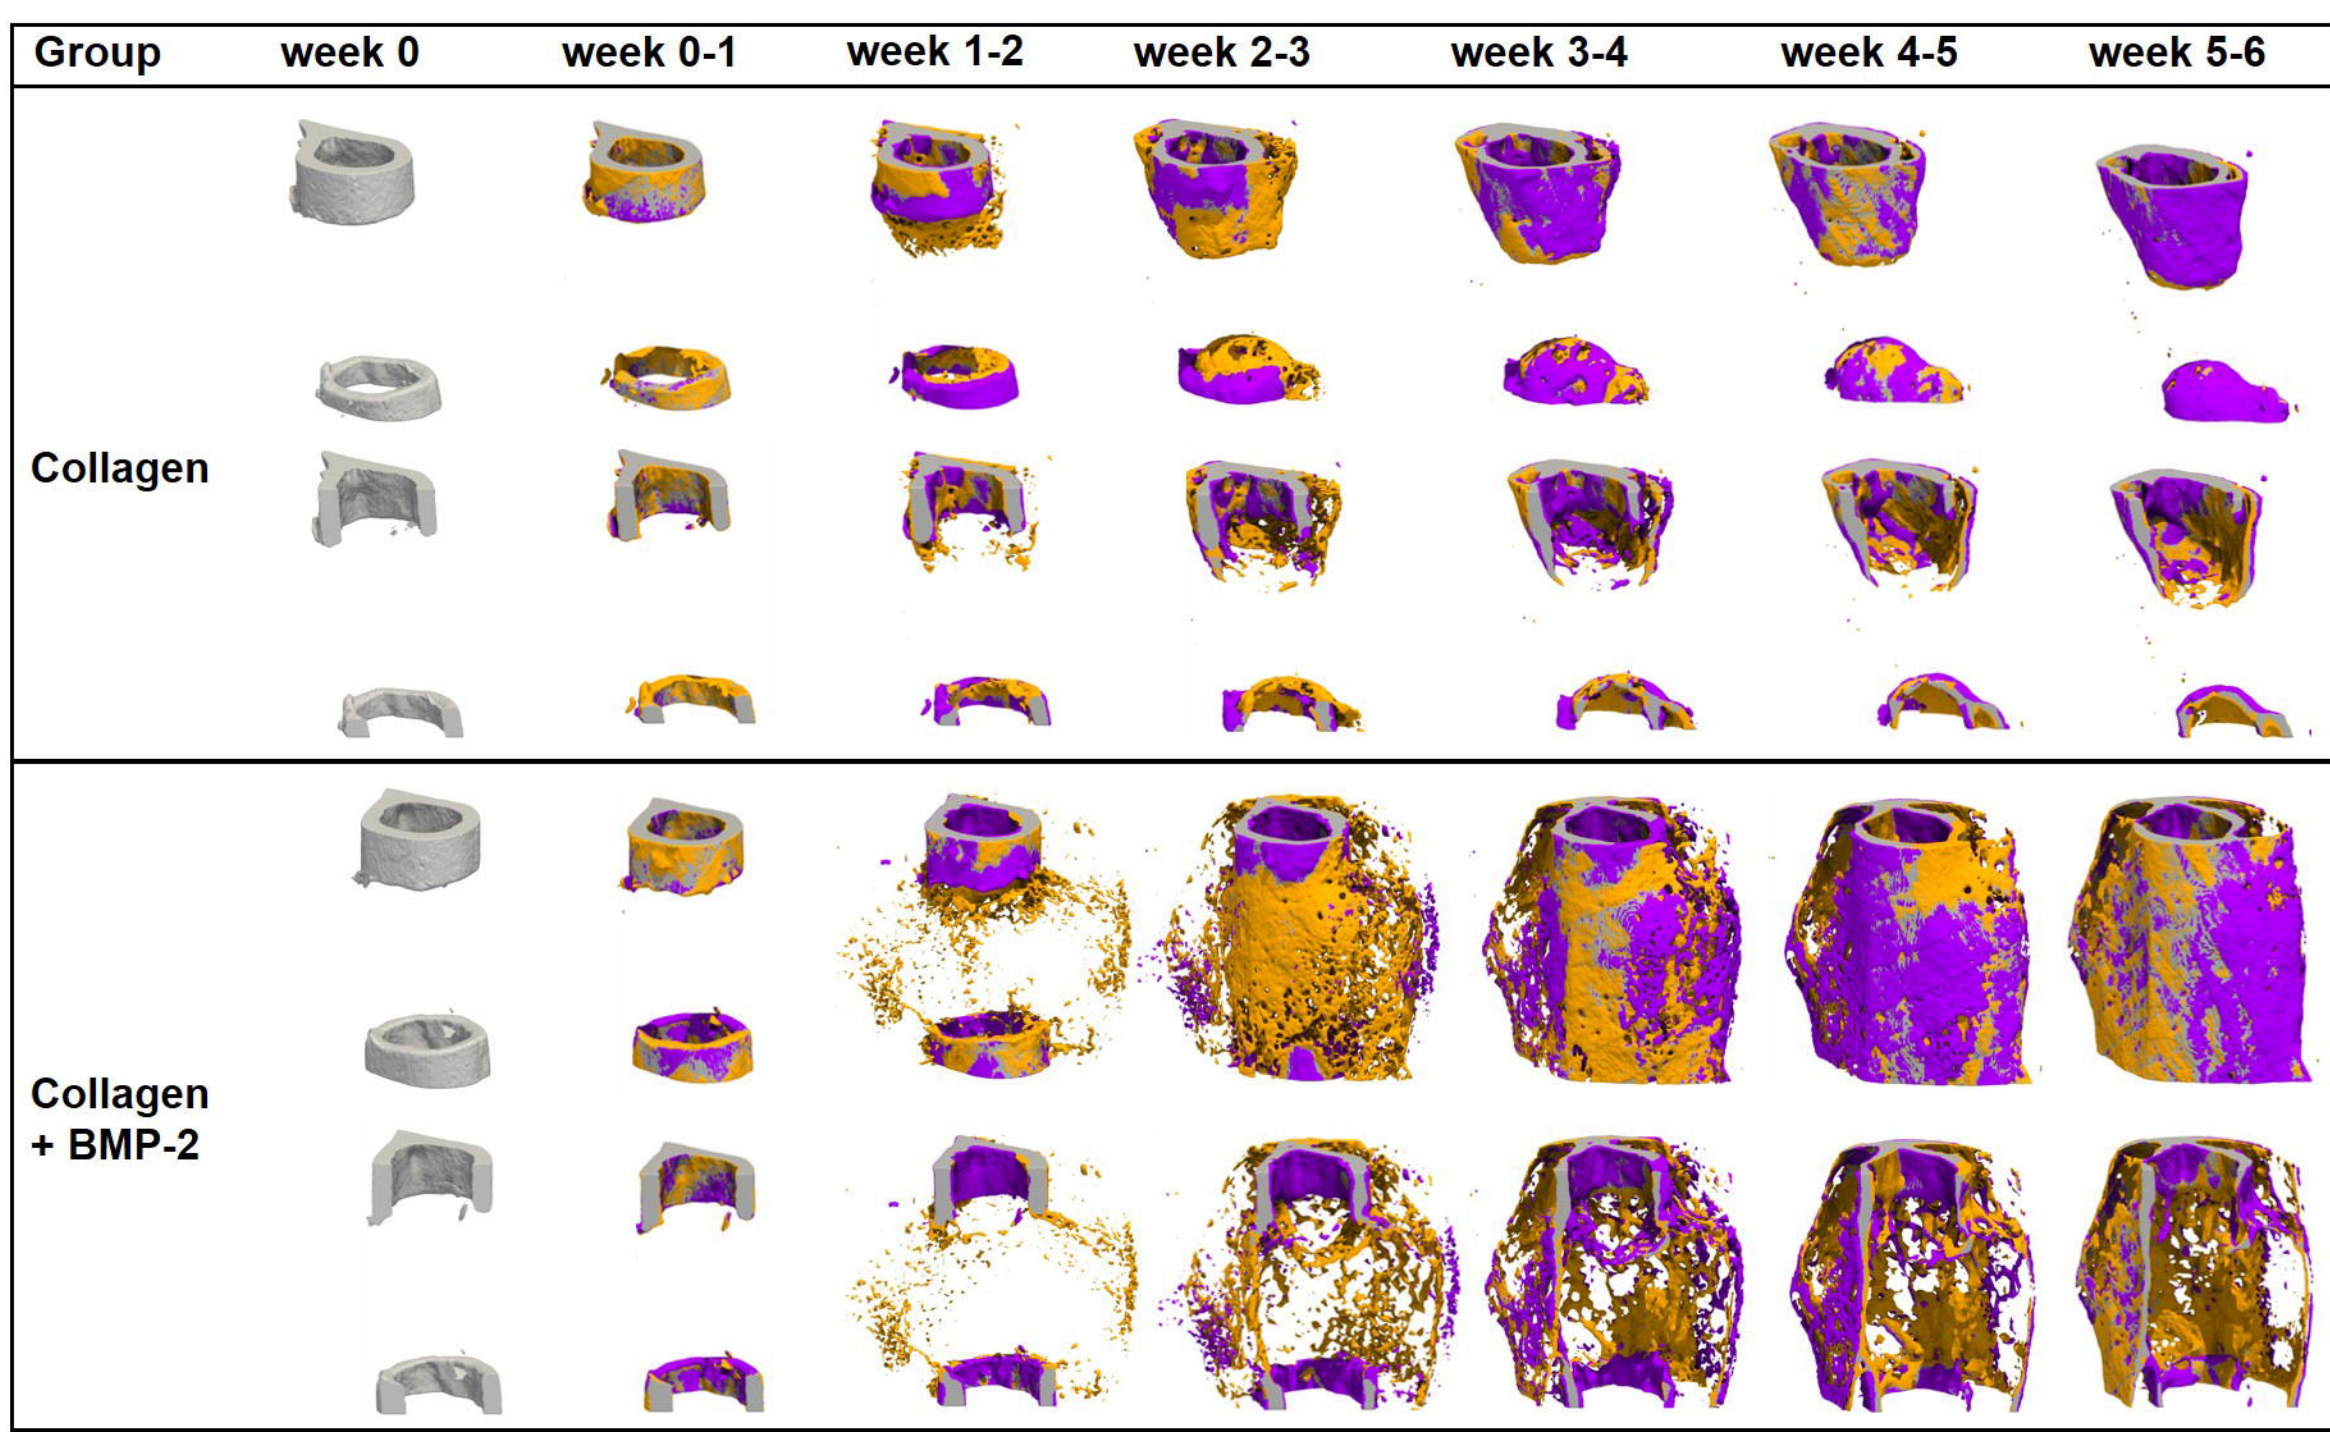



**Figure 4**

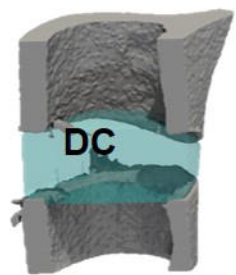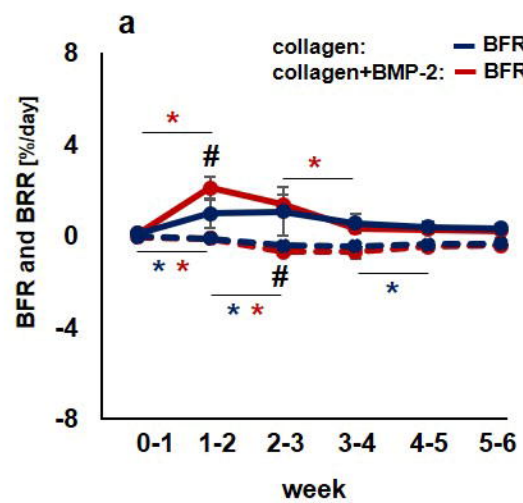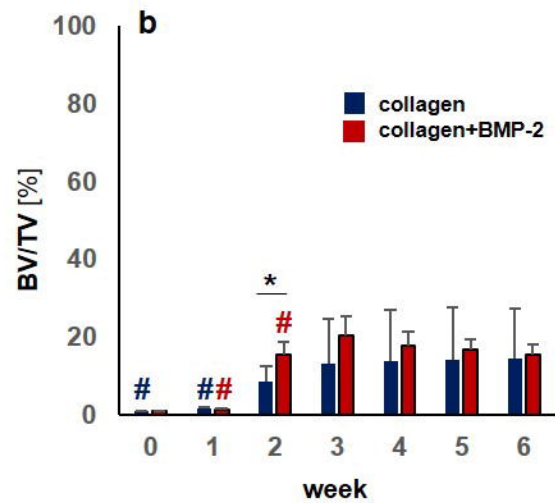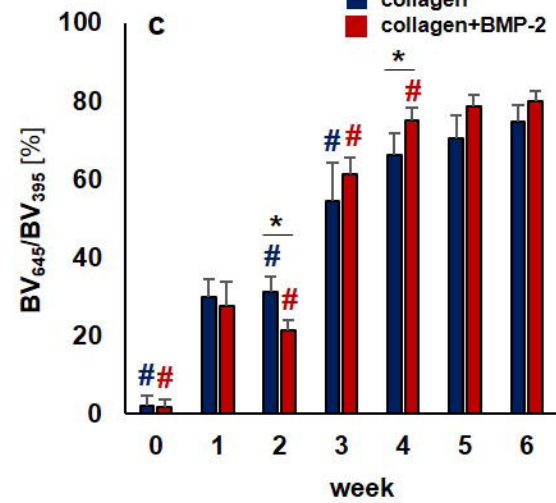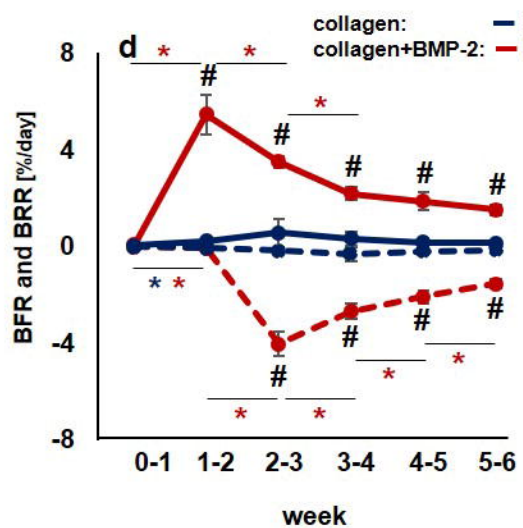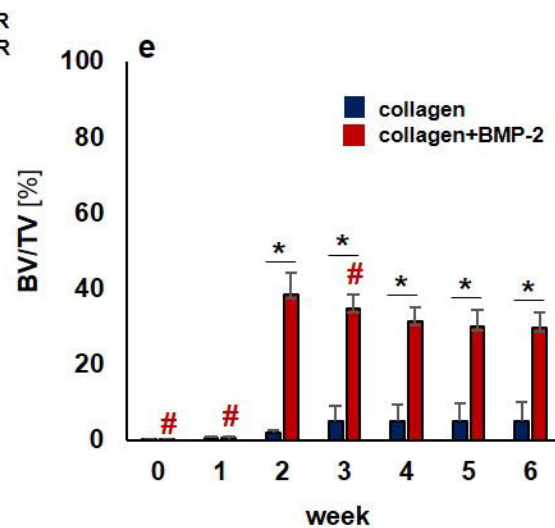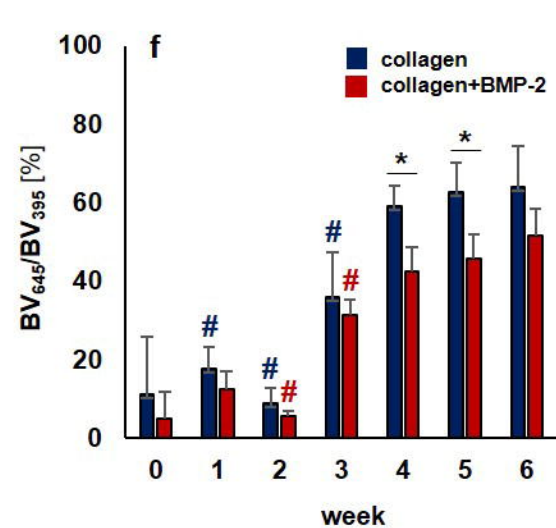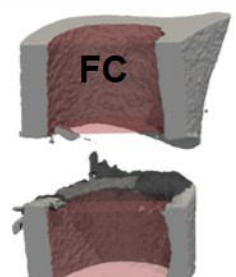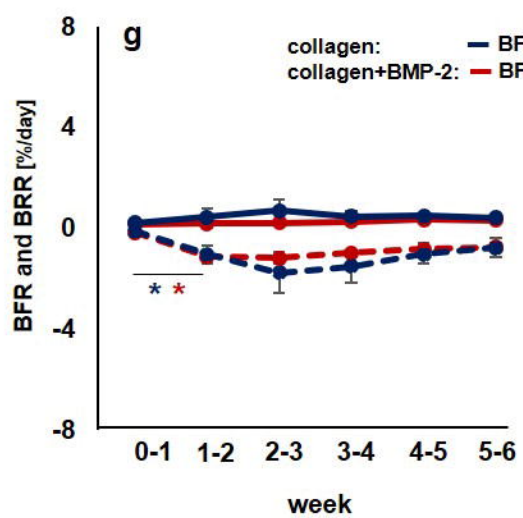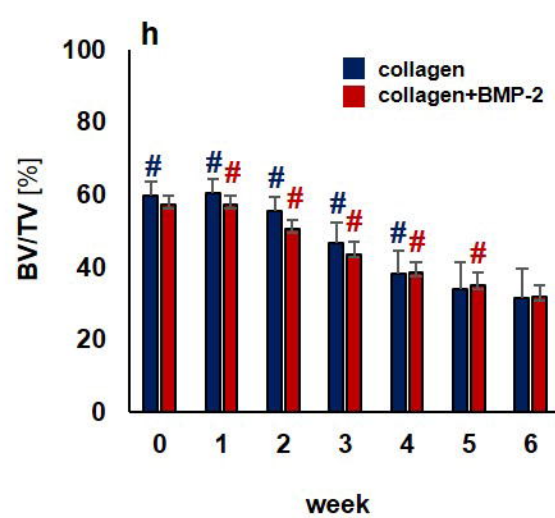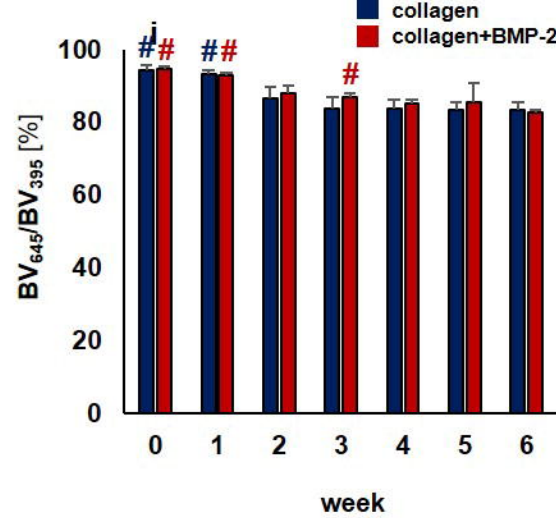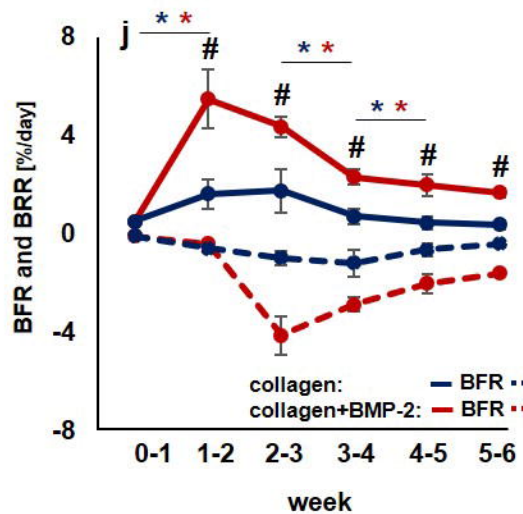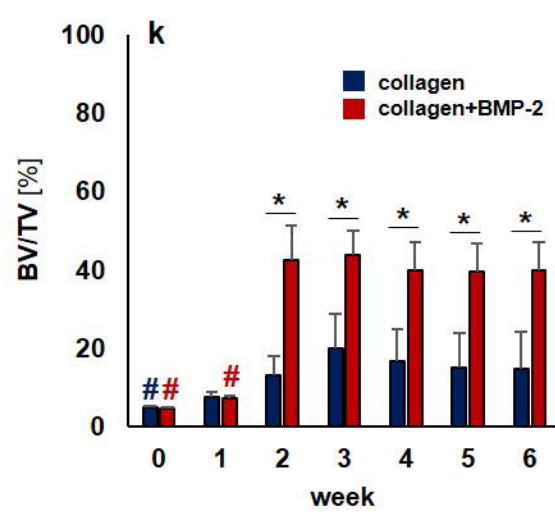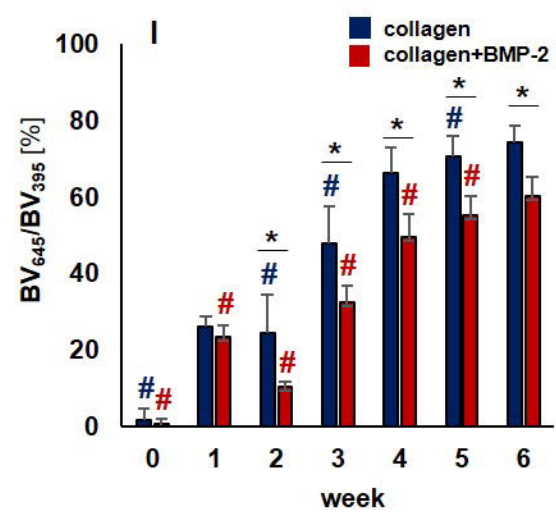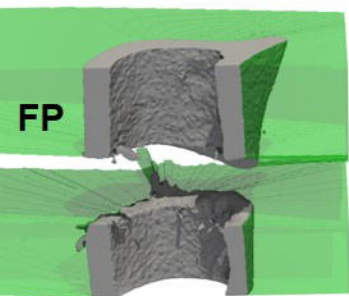



**Figure 5**

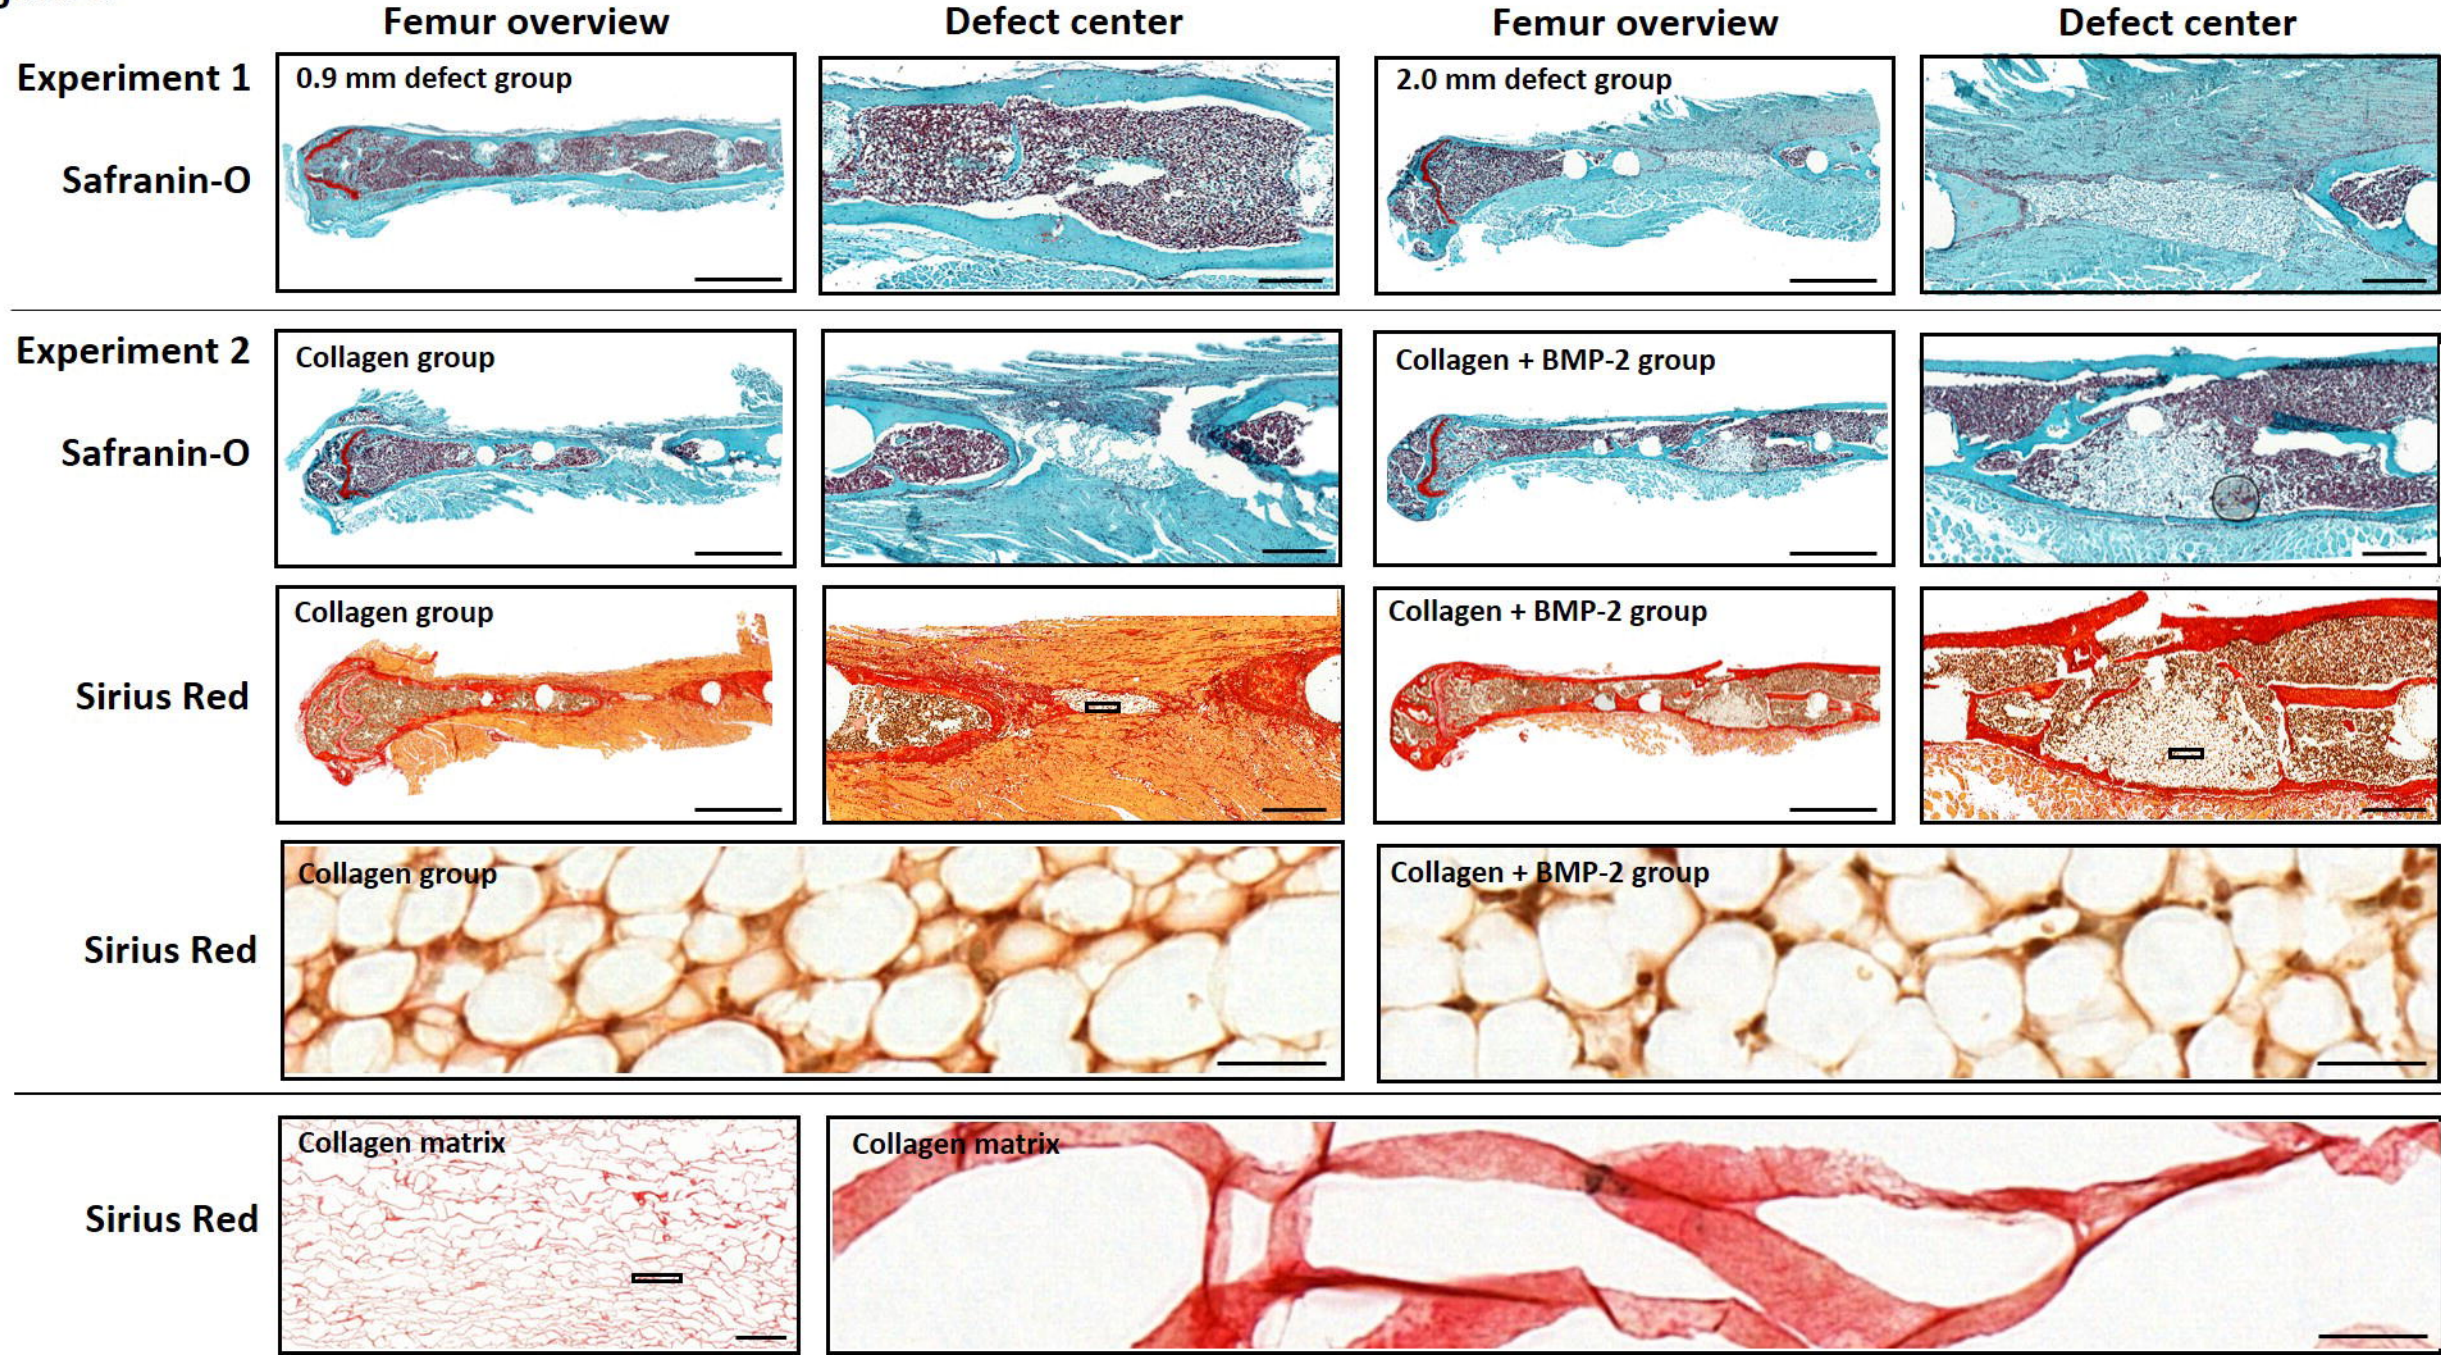

Source: https://www.biorxiv.org/content/10.1101/2020.10.02.324061v2.full.pdf
