# Supplementary material for: Longitudinal in vivo micro-CT-based approach allows spatio-temporal characterization of fracture healing patterns and assessment of biomaterials in mouse femur defect models
Source: bioRxiv or medRxiv preprint supplement (doi:10.1101/2020.10.02.324061), 2021-01-15
Supplement: Supplementary file [file media-2.pdf]

**Longitudinal *in vivo* micro-CT-based approach allows spatio-temporal characterization of fracture healing patterns and assessment of biomaterials in mouse femur defect models**

Esther Wehrle<sup>1</sup>, Duncan C Tourolle né Betts<sup>1</sup>, Gisela A Kuhn<sup>1</sup>, Erica Floreani<sup>1</sup>, Malavika H Nambiar<sup>1</sup>, Bryant J Schroeder<sup>1</sup>, Sandra Hofmann<sup>1,2</sup>, Ralph Müller<sup>1</sup>

<sup>1</sup> Institute for Biomechanics, ETH Zurich, Zurich, Switzerland, <sup>2</sup> Department of Biomedical Engineering and Institute for Complex Molecular Systems, Eindhoven University of Technology, The Netherlands.

**Corresponding author:**

Ralph Müller, PhD

Institute for Biomechanics

ETH Zurich

Leopold-Ruzicka-Weg 4

8093 Zurich, Switzerland

Email: ram@ethz.ch

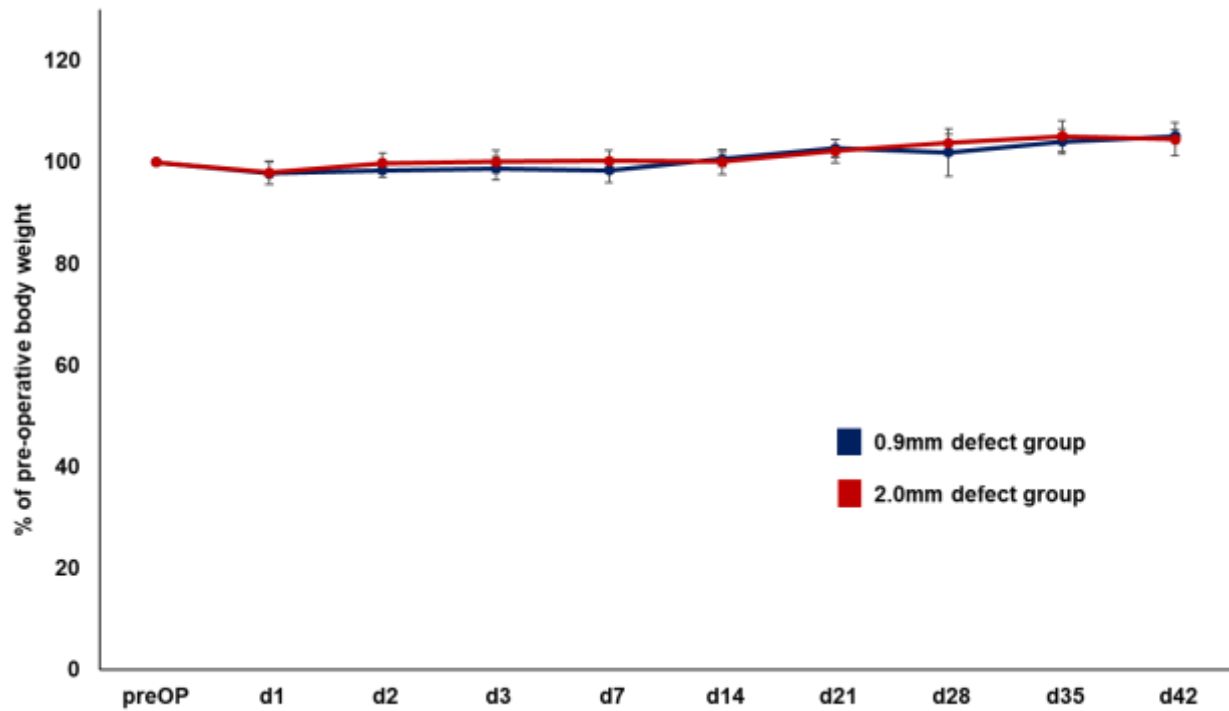

**Supplementary Fig. S1.** *In vivo* monitoring of body weight of the mice from the 0.9mm defect group (n=8) and the 2.0mm defect group (n=10) measured pre-operatively (preOP), on postoperative days 1-3 and weekly from day 7 to day 42. The postoperative values were related to the preoperative data.

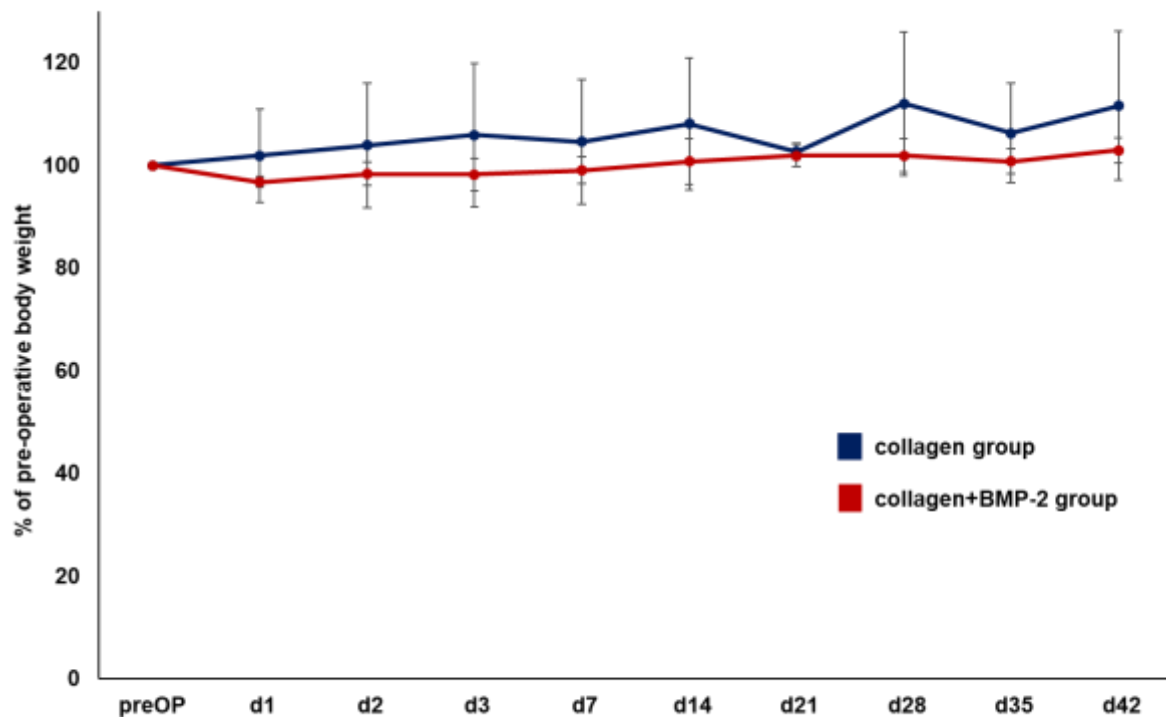

**Supplementary Fig. S2.** *In vivo* monitoring of body weight of the mice from the collagen group (n=8) and the collagen+BMP-2 group (n=8) measured pre-operatively (preOP), on postoperative days 1-3 and weekly from day 7 to day 42. The postoperative values were related to the preoperative data.

**Supplementary Table S1.** Study design (female 20 week-old C57BL/6J mice)

| Experiment | Group           | Group size | Size of femur defect | Biomaterial application | <i>In vivo</i> micro-CT measurements | Registration of micro-CT scans # | Histology    |
|------------|-----------------|------------|----------------------|-------------------------|--------------------------------------|----------------------------------|--------------|
| 1          | 0.9mm           | n=11       | 0.9mm (n=10)         | -                       | d0, week 1-6 (n=10)                  | week 1-6 to week 0-5 (n=10)      | week 6 (n=2) |
|            | 2.0mm           | n=8        | 2.0mm (n=8)          | -                       | d0, week 1-6 (n=8)                   | week 1-6 to week 0-5 (n=7)       | week 6 (n=2) |
| 2          | collagen        | n=8        | 2mm (n=8)            | collagen                | d0, week 5+6 (n=8)                   | week 1-6 to week 0-5 (n=8)       | week 6 (n=1) |
|            | collagen +BMP-2 | n=8        | 2mm (n=8)            | collagen +BMP-2         | d0, week 5+6 (n=8)                   | week 1-6 to week 0-5 (n=8)       | week 6 (n=1) |

# micro-CT scan taken at timepoint x registered to micro-CT scan taken at timepoint x-1

**Supplementary Video 1.** Visualisation of the defect healing process and the VOIs involved for a representative animal from the 0.9mm defect group and the 2.0mm defect group.

**Supplementary Video 2.** Visualisation of the defect healing process and the VOIs involved for a representative animal from the collagen group and the collagen+BMP-2 group).
